# Supplementary material for: Common genetic variants and modifiable risk factors underpin hypertrophic cardiomyopathy susceptibility and expressivity
Source: Springer Nature journal article supplement (doi:10.1038/s41588-020-00764-0), 2021-01-25
Supplement: MOESM3 [file 41588_2020_764_MOESM3_ESM%20%282%29.xlsx]

## Sheet: Contents
	Contents
	S1	Demographic details for cases and controls analyses of component GWAS studies.
	S2	Meta-analysis summary statistics for all variants <%5 FDR threshold derived from the all-comer HCM meta-analysis performed in GWAMA
	S3	Independent variant derived from a stepwise model selection procedure (--cojo-slct) using GCTA.
	S4	Summary statistics for variants deemed independent following a COJO analysis, from the multi-ancestry all comer HCM meta-analysis.
	S5	Gene based analysis
	S6	Tissue enrichment analysis performed using gene-level association data
	S7	Tissue enrichment derived from functional GWAS analysis
	S8	Sentinel loci with evidence of enrichment in cardiac specific cell types.
	S9	Framework for the re-designation of variants of uncertain significance to facilitate the stratification of HCM into sarcomere positive and sarcomere negative groups
	S10	Gene level stratification of HCMR cohort
	S11	SNP-heritability estimates calculated using GREML-LDMS
	S12	Meta-analysis summary statistics for all variants <%5 FDR threshold derived from the sarcomere negative HCM analysis.
	S13	GWAS summary statistics for all variants <%5 FDR threshold derived from the sarcomere positive HCM analysis
	S14	Pairwise GWAS analysis between sarcomere negative and saromere positive HCM.
	S15	Power to detect sarcomere negative loci in sarcomere positive GWAS.
	S16	Genetic risk score derived from all-comer HCM meta-analysis.
	S17	Performance of a HCM Genetic Risk Score in discovery and validation cohorts
	S18	Genetic Risk Score performance across principal component derived ancestral groups
	S19	Mendelian randomisation analysis evaluating risk phenotypes (type 2 diabetes (T2DM), systolic blood pressure (SBP), diastolic blood pressure (DBP), body mass index (BMI), and waist-hip ratio adjusted for BMI (WHRadjBMI)) with respect to hypertrophic cardiomyopathy.
	S20	Two sample mendelian randomisation analysis evaluating traditional risk-outcome relationships, with a standarised genetic instrument, to provide context regarding the effect size observed in hypertrophic cardiomyopathy
	S21	Rare variants derived from HCMR study.
	S22	Rare variants identified in validation studies (RBH, AMC)
	S23	ICD10 codes associated with phenotypes screened for and removed from UK Biobank control cohort
	S24	Evaluation of pleiotropy
	S25	Evaluation of association between independent SNPs identified through multi-ancestry HCM meta-analysis, sarcomere positive GWAS, or sarcomere negative meta-analysis with proteins and metabolites

## Sheet: S1
Supplementary Table 1: Demographic details for component case-control GWAS studies. Details provided regarding the total number of individuals, age, gender, genetically inferred ancestry, SNP-heritability and technical GWAS details. Abbreviations: AFR: African; AMR: Ad Mixed American; EAS: East Asian; EUR: European; FIN, Finnish European; SAS: South Asian.
		Total (n)	Age (SD)	Gender (% male)	Ancestry (n (%))								Software	Variants	SNP heritability	5% FDR p-value	Lambda
All-comer analysis					AFR	AMR	EAS	EUR	FIN	SAS	Other	NA
Component GWAS	HCMR cases	2541	49.6 (11.2)	72.2	227 (8.93)	122 (4.8)	66 (2.6)	1994 (78.5)	0 (0)	132 (5.19)	0 (0)	0 (0)	SNPTEST	7822902	0.352 (0.0181)	1.5e-06	1.191
	UKBB controls	40283	54.0 (6.95)	71.5	1148 (2.85)	170 (0.42)	267 (0.66)	37203 (92.4)	288 (0.72)	1207 (3.0)	0 (0)	0 (0)
	BRRD cases	239	57.8 (11.1)	80.3	6 (2.51)	-	4 (1.67)	202 (84.5)	0 (0)	6 (2.51)	9 (3.77)	12 (5.02)	SAIGE	9341129	0.676 (0.164)	1e-06	1.049
	BRRD controls	7203	41.2 (21.3)	30.8	183 (2.54)	-	66 (0.92)	5394 (74.9)	17 (0.24)	520 (7.22)	722 (10)	301 (4.18)
Meta-analysis	cases	2780	-	-	233 (8.38)	122 (4.39)	70 (2.52)	2196 (78.99)	0 (0)	138 (4.96)	9 (0.32)	12 (0.43)	GWAMA	8590397	NA	1.82e-06	1.03
	controls	47486	-	-	1331 (2.8)	170 (0.36)	333 (0.7)	42597 (89.7)	305 (0.64)	1727 (3.64)	722 (1.52)	301 (0.63)
Sarcomere negative
Component GWAS	HCMR cases	1635	51.4 (10.4)	75.8	164 (10)	93 (5.69)	48 (2.94)	1242 (76)	0 (0)	88 (5.38)	0 (0)	-	SNPTEST	7831037	0.340 (0.024)	1.5e-06	1.142
	UKBB controls	20141	53.9 (6.92)	71.9	555 (2.76)	78 (0.39)	146 (0.73)	18590 (92.3)	160 (0.79)	612 (3.04)	0 (0)	-
	BRRD cases	239	57.8 (11.1)	80.3	6 (2.51)	-	4 (1.67)	202 (84.5)	0 (0)	6 (2.51)	9 (3.77)	12 (5.02)	SAIGE	9341129	0.676 (0.164)	1e-06	1.049
	BRRD controls	7203	41.2 (21.3)	30.8	183 (2.54)	-	66 (0.92)	5394 (74.9)	17 (0.24)	520 (7.22)	722 (10)	301 (4.18)
Meta-analysis	cases	1874	-	-	170 (9.07)	93 (4.96)	52 (2.77)	1444 (77.05)	0 (0)	94 (5.02)	9 (0.48)	12 (0.64)	GWAMA	8591409	NA	1.56e-06	1.047
	controls	27344	-	-	738 (2.7)	78 (0.29)	212 (0.78)	23984 (87.71)	177 (0.65)	1132 (4.14)	722 (2.64)	301 (1.1)
Sarcomere positive
Component GWAS	HCMR cases	871	46.2 (12.0)	65.9	54 (6.2)	28 (3.21)	18 (2.07)	728 (83.6)	0 (0)	43 (4.94)	0 (0)	0 (0)	SNPTEST	7817813	0.158 (0.038)	1.59e-06	1.089
	UKBB controls	20142	54.1 (6.97)	71.2	593 (2.94)	92 (0.46)	121 (0.6)	18613 (92.4)	128 (0.64)	595 (2.95)	0 (0)	0 (0)

## Sheet: S2
Supplementary Table 2: Independent variants derived from a stepwise model selection procedure (--cojo-slct) using GCTA. Linkage disequilibrium metrics were based on 62,018 unrelated, European individuals pseudo-randomly selected from the UKBB. P-value thresholds determined by the study specific 5% FDR level. Joint p-values used to establish conditional SNPs using 5% FDR threshold. CHR: chromosome…
Group	Study	Locus Name	Chr	SNP	bp	refA	freq	b	se	p	n	freq_geno	bJ	bJ_se	pJ	LD_r	Variant type (VEP)	Variant impact (VEP)	HCMR vs. UKBB INFO
All comer	HCMR vs. UKBB	HSPB7	1	rs1048302	16340879	T	0.3258	0.2749	0.0345027	1.61941e-15	51612.2	0.324003	0.2749	0.0345236	1.68375e-15	0	3_prime_UTR_variant	MODIFIER	0.993653
All comer	HCMR vs. UKBB	TCF7L2	10	rs11196085	114505037	T	0.7217	-0.1835	0.0373298	8.84892e-07	48254.3	0.740219	-0.183106	0.0373387	9.39465e-07	0.00109006	intron_variant	MODIFIER	0.953304
All comer	HCMR vs. UKBB	BAG3	10	rs72840788	121415685	G	0.7909	-0.3986	0.0395565	7.00125e-24	52116.8	0.788609	-0.398396	0.0395946	8.14264e-24	0	intron_variant	MODIFIER	0.961853
All comer	HCMR vs. UKBB	CYP2R1	11	rs1390519	14928023	A	0.6664	-0.2027	0.0416522	1.13595e-06	35011.3	0.736641	-0.2027	0.0416657	1.14504e-06	0	intron_variant	MODIFIER	0.701001
All comer	HCMR vs. UKBB	OR5AK2	11	rs78310129	56793878	C	0.98778	-0.7679	0.140914	5.0538e-08	56345.8	0.987647	-0.774793	0.140957	3.87061e-08	-0.010352	upstream_gene_variant	MODIFIER	0.726077
All comer	HCMR vs. UKBB	SSRP1	11	rs117534260	57103068	A	0.98131	-0.5343	0.108376	8.22126e-07	62701.6	0.981949	-0.540147	0.108402	6.26618e-07	0	non_coding_transcript_exon_variant	MODIFIER	0.901246
All comer	HCMR vs. UKBB	TBX3	12	rs7300371	115371181	T	0.2668	-0.2396	0.0405497	3.44622e-09	41974.9	0.268836	-0.2396	0.0405661	3.49647e-09	0	intergenic_variant	MODIFIER	0.982549
All comer	HCMR vs. UKBB	ADPRHL1	13	rs41306688	114078558	A	0.96643	-0.5889	0.093761	3.36702e-10	47337.6	0.965913	-0.5889	0.0937991	3.42268e-10	0	missense_variant	MODERATE	0.702117
All comer	HCMR vs. UKBB	ADAMTS7	15	rs8043123	78973393	C	0.7571	-0.1936	0.0377991	3.02613e-07	51400.6	0.768671	-0.192099	0.0378095	3.76043e-07	0.00786608	intron_variant	MODIFIER	0.964592
All comer	HCMR vs. UKBB	ALPK3	15	rs8033459	85253258	C	0.5293	-0.182	0.034088	9.33954e-08	46646.7	0.543433	-0.180702	0.034099	1.16228e-07	0	intron_variant	MODIFIER	0.980889
All comer	HCMR vs. UKBB	SPPL2C	17	rs393838	43705756	G	0.7735	-0.2418	0.0386723	4.03849e-10	51531.8	0.775058	-0.2418	0.0386866	4.09867e-10	0	intron_variant	MODIFIER	0.982683
All comer	HCMR vs. UKBB	PRKCA	17	rs7210446	64307014	G	0.4185	-0.2139	0.0383776	2.49585e-08	37668.4	0.418994	-0.2139	0.0383929	2.52791e-08	0	intron_variant	MODIFIER	0.830452
All comer	HCMR vs. UKBB	FHOD3	18	rs2644262	34223566	T	0.7145	-0.3253	0.037166	2.08467e-18	47878.3	0.728626	-0.298392	0.0375316	1.85896e-15	0.172221	intron_variant	MODIFIER	0.904091
All comer	HCMR vs. UKBB	FHOD3	18	rs118060942	34280732	C	0.98789	-0.7728	0.119084	8.61051e-11	79605	0.988603	-0.645171	0.120192	7.96815e-08	0	intron_variant	MODIFIER	0.952519
All comer	HCMR vs. UKBB	STRN	2	rs11124555	37176213	G	0.5142	-0.1824	0.0344373	1.17986e-07	45584.9	0.533584	-0.1824	0.0344475	1.19005e-07	0	intron_variant	MODIFIER	0.955571
All comer	HCMR vs. UKBB	MMP11	22	rs7284877	24155111	G	0.2189	0.2925	0.0397311	1.81187e-13	50009.2	0.195096	0.2925	0.0397522	1.86576e-13	0	intron_variant	MODIFIER	0.913547
All comer	HCMR vs. UKBB	SLC6A6	3	rs13061705	14291129	C	0.6851	0.2252	0.0421979	9.46242e-08	35146.1	0.675763	0.2252	0.0422144	9.5718e-08	0	intergenic_variant	MODIFIER	0.848367
All comer	HCMR vs. UKBB	FNDC3B	3	rs4894803	171800256	A	0.5955	-0.1861	0.0377664	8.32185e-07	39305.8	0.594076	-0.1861	0.0377776	8.38419e-07	0	intron_variant	MODIFIER	0.832852
All comer	HCMR vs. UKBB	AK098570	5	rs66761011	29426502	A	0.8298	-0.3486	0.066244	1.42213e-07	21775.5	0.916658	-0.3486	0.0662846	1.44728e-07	0	intergenic_variant	MODIFIER	0.40866
All comer	HCMR vs. UKBB	CDKN1A	6	rs762624	36645588	A	0.7181	-0.228	0.0358016	1.90983e-10	52036.6	0.737608	-0.228	0.0358153	1.94018e-10	0	5_prime_UTR_variant	MODIFIER	0.968545
All comer	HCMR vs. UKBB	PLN	6	rs12212795	118654308	G	0.94699	-0.4332	0.064956	2.57321e-11	63751.1	0.946361	-0.435878	0.0649802	1.97504e-11	-0.00933398	intergenic_variant	MODIFIER	0.998152
All comer	HCMR vs. UKBB	TRDN	6	rs9320939	123818871	G	0.5162	-0.1737	0.0340225	3.30012e-07	46717.1	0.505862	-0.175524	0.0340327	2.50251e-07	0	intron_variant	MODIFIER	0.964799
All comer	HCMR vs. UKBB	RAPGEF1,POMT1	9	rs734638	134489810	C	0.7112	-0.1957	0.0372861	1.53256e-07	47293.2	0.704562	-0.1957	0.0372966	1.54486e-07	0	intron_variant	MODIFIER	0.946881
All comer	BRRD vs. BRRD	FHOD3	18	rs16968220	34291197	C	0.6467	-0.5533	0.09966	2.82619e-08	7257.79	0.659512	-0.5533	0.0998645	3.01601e-08	0	non_coding_transcript_exon_variant	MODIFIER	NA
All comer	BRRD vs. BRRD	BAG3	10	rs61869036	121422836	G	0.799	-0.6398	0.1217	1.46273e-07	6926	0.785721	-0.6398	0.121934	1.54504e-07	0	intron_variant	MODIFIER	NA
All comer	BRRD vs. BRRD	YTHDC2	5	rs139472654	113041969	C	0.97662	-1.806	0.349	2.28173e-07	5920.6	0.974105	-1.806	0.349759	2.42302e-07	0	intergenic_variant	MODIFIER	NA
All comer	meta-analysis	HSPB7	1	rs1048302	16340879	T	0.324764	0.276737	0.032664	2.40734e-17	60411.1	0.324003	0.276737	0.0326831	2.51203e-17	0	3_prime_UTR_variant	MODIFIER	0.993653
All comer	meta-analysis	TCF7L2	10	rs11196085	114505037	T	0.721152	-0.189678	0.035206	7.13804e-08	56747.3	0.740219	-0.189263	0.0352147	7.67757e-08	0.00109006	intron_variant	MODIFIER	0.953304
All comer	meta-analysis	BAG3	10	rs72840788	121415685	G	0.792188	-0.420873	0.037619	4.68018e-29	60615.7	0.788609	-0.42066	0.0376575	5.67565e-29	0	intron_variant	MODIFIER	0.961853
All comer	meta-analysis	CYP2R1	11	rs1390519	14928023	A	0.6664	-0.2027	0.041652	1.13584e-06	36667.9	0.736641	-0.2027	0.0416649	1.14452e-06	0	intron_variant	MODIFIER	0.701001
All comer	meta-analysis	OR5AK2*	11	rs78310129	56793878	C	0.98778	-0.7679	0.140914	5.05335e-08	59011.5	0.987647	-0.778075	0.140964	3.3967e-08	0	upstream_gene_variant	MODIFIER	0.726077
All comer	meta-analysis	SSPN	12	rs1480036	26344726	T	0.235801	-0.210931	0.041377	3.43653e-07	45843.8	0.238192	-0.210931	0.0413883	3.46182e-07	0	intron_variant	MODIFIER	0.900519
All comer	meta-analysis	TBX3	12	rs7301677	115381147	C	0.731933	0.213645	0.037506	1.22444e-08	51239.5	0.727468	0.213645	0.0375175	1.23704e-08	0	intergenic_variant	MODIFIER	0.995742
All comer	meta-analysis	ADPRHL1	13	rs41306688	114078558	A	0.96687	-0.601043	0.088384	1.04358e-11	56507.1	0.965913	-0.601043	0.0884194	1.06348e-11	0	missense_variant	MODERATE	0.702117
All comer	meta-analysis	CHRNB4	15	rs1814880	79021140	T	0.262658	0.179413	0.034204	1.5596e-07	62429.4	0.238407	0.178554	0.0342116	1.79791e-07	-0.00453961	intron_variant	MODIFIER	0.9992
All comer	meta-analysis	ALPK3	15	rs8033459	85253258	C	0.529167	-0.189921	0.032107	3.31368e-09	55063	0.543433	-0.189206	0.0321172	3.83581e-09	0	intron_variant	MODIFIER	0.980889
All comer	meta-analysis	SPPL2C	17	rs28768976	43688317	A	0.772212	-0.254994	0.036752	3.9703e-12	59513.3	0.774945	-0.254994	0.0367666	4.0482e-12	0	NA	NA	NA
All comer	meta-analysis	PRKCA	17	rs7210446	64307014	G	0.419359	-0.219756	0.035588	6.61623e-10	45849.5	0.418994	-0.219756	0.0356024	6.72168e-10	0	intron_variant	MODIFIER	0.830452
All comer	meta-analysis	FHOD3	18	rs118060942	34280732	C	0.987906	-0.798616	0.114531	3.1042e-12	90245.7	0.988603	-0.668375	0.11545	7.06792e-09	0.152386	intron_variant	MODIFIER	0.952519
All comer	meta-analysis	FHOD3	18	rs4799426	34280891	A	0.654856	-0.320945	0.032384	3.74376e-23	59603.6	0.663701	-0.297528	0.0326618	8.28828e-20	0	intron_variant	MODIFIER	0.982014
All comer	meta-analysis	AZU1	19	rs117710064	779606	C	0.865411	-0.222253	0.045118	8.39135e-07	59660.4	0.86073	-0.222253	0.0451268	8.43266e-07	0	upstream_gene_variant	MODIFIER	0.988734
All comer	meta-analysis	E2F6,ROCK2	2	rs7556984	11599732	G	0.663224	0.185746	0.036986	5.11196e-07	46289.7	0.666412	0.185746	0.0369957	5.14704e-07	0	intron_variant	MODIFIER	0.874184
All comer	meta-analysis	STRN	2	rs2003585	37123383	T	0.489832	0.173631	0.032405	8.40763e-08	53898.9	0.465095	0.173631	0.0324133	8.47192e-08	0	intron_variant	MODIFIER	0.96874
All comer	meta-analysis	TTN	2	rs62177303	179768624	C	0.614183	0.174706	0.035189	6.87754e-07	48203.8	0.594698	0.174706	0.0351976	6.92081e-07	0	intron_variant	MODIFIER	0.90218
All comer	meta-analysis	MAP3K7CL	21	rs2832230	30536712	G	0.831723	0.250812	0.051148	9.4071e-07	38624.9	0.843158	0.250812	0.0511633	9.47741e-07	0	intron_variant	MODIFIER	0.748583
All comer	meta-analysis	MMP11	22	rs2070458	24159307	A	0.219102	0.292886	0.037606	6.79283e-15	58423.7	0.191321	0.292886	0.0376252	7.00974e-15	0	intron_variant	MODIFIER	0.915451
All comer	meta-analysis	SLC6A6	3	rs13061705	14291129	C	0.686625	0.224098	0.038976	8.94332e-09	43260.1	0.675763	0.224098	0.0389904	9.05664e-09	0	intergenic_variant	MODIFIER	0.848367
All comer	meta-analysis	FNDC3B	3	rs4894803	171800256	A	0.59661	-0.179213	0.035156	3.43895e-07	47549.3	0.594076	-0.179213	0.0351652	3.46335e-07	0	intron_variant	MODIFIER	0.832852
All comer	meta-analysis	AK098570	5	rs66761011	29426502	A	0.8298	-0.3486	0.066244	1.42215e-07	22806.2	0.916658	-0.3486	0.0662828	1.44615e-07	0	intergenic_variant	MODIFIER	0.40866
All comer	meta-analysis	PROB1	5	rs10052399	138668504	T	0.264204	0.206369	0.038098	6.06773e-08	50123.4	0.249749	0.206369	0.0381088	6.11988e-08	0	downstream_gene_variant	MODIFIER	0.831436
All comer	meta-analysis	CDKN1A	6	rs3176326	36647289	G	0.791378	-0.246957	0.036882	2.14395e-11	62966.9	0.804375	-0.246957	0.0368948	2.17838e-11	0	intron_variant	MODIFIER	0.961202
All comer	meta-analysis	PLN	6	rs12212795	118654308	G	0.946888	-0.392746	0.062034	2.43355e-10	73081	0.946361	-0.395508	0.0620526	1.84466e-10	-0.00933398	intergenic_variant	MODIFIER	0.998152
All comer	meta-analysis	TRDN	6	rs9320939	123818871	G	0.517177	-0.173712	0.031994	5.65064e-08	55335	0.505862	-0.175369	0.0320033	4.26023e-08	0	intron_variant	MODIFIER	0.964799
All comer	meta-analysis	MTSS1	8	rs7003871	125851510	C	0.336482	0.169008	0.034705	1.11685e-06	52601.9	0.336741	0.169008	0.0347125	1.12281e-06	0	intron_variant	MODIFIER	0.921776
All comer	meta-analysis	RAPGEF1,POMT1	9	rs734638	134489810	C	0.712518	-0.186446	0.035083	1.06994e-07	56101.8	0.704562	-0.186446	0.0350915	1.07755e-07	0	intron_variant	MODIFIER	0.946881
sarcomere negative	meta-analysis	RNF207	1	rs846111	6279370	G	0.73309	0.255081	0.050935	5.50068e-07	23159.7	0.727571	0.255081	0.0509615	5.5755e-07	0	missense_variant	MODERATE	0.796142
sarcomere negative	meta-analysis	HSPB7	1	rs1048302	16340879	T	0.326029	0.291246	0.039751	2.35785e-13	33843	0.324003	0.291246	0.0397819	2.46014e-13	0	3_prime_UTR_variant	MODIFIER	0.99352
sarcomere negative	meta-analysis	BAG3	10	rs72840788	121415685	G	0.791849	-0.491921	0.045421	2.47466e-27	34493.9	0.788609	-0.491921	0.0454975	3.01868e-27	0	intron_variant	MODIFIER	0.962028
sarcomere negative	meta-analysis	SSPN	12	rs17380837	26345526	C	0.711354	0.230094	0.045176	3.51922e-07	28059.9	0.701411	0.230094	0.0451961	3.56147e-07	0	intron_variant	MODIFIER	0.936451
sarcomere negative	meta-analysis	TBX3	12	rs7977151	115362972	A	0.303755	-0.227892	0.044233	2.57612e-07	28416.5	0.300896	-0.22801	0.0442529	2.57128e-07	0.000567376	intergenic_variant	MODIFIER	0.973628
sarcomere negative	meta-analysis	TBX3	12	rs35357	115606207	A	0.170853	0.254058	0.051592	8.46334e-07	31188.6	0.162915	0.254202	0.0516112	8.42209e-07	0	intergenic_variant	MODIFIER	0.867032
sarcomere negative	meta-analysis	ADPRHL1	13	rs41306688	114078558	A	0.966963	-0.629527	0.10661	3.52748e-09	32380.1	0.965913	-0.629527	0.106666	3.59411e-09	0	missense_variant	MODERATE	0.70634
sarcomere negative	meta-analysis	ADAMTS7	15	rs8043123	78973393	C	0.753883	-0.224144	0.04298	1.83741e-07	34310.6	0.768671	-0.222191	0.0429983	2.3733e-07	-0.0101687	intron_variant	MODIFIER	0.964912
sarcomere negative	meta-analysis	ALPK3	15	rs748455	85149575	T	0.71593	0.21998	0.04473	8.74543e-07	28899.9	0.707891	0.217822	0.0447499	1.12995e-06	0	intron_variant	MODIFIER	0.977799
sarcomere negative	meta-analysis	HP	16	rs139235535	72759681	C	0.974836	-0.549458	0.113136	1.19409e-06	37459.7	0.974673	-0.549458	0.11317	1.20295e-06	0	intron_variant	MODIFIER	0.772265
sarcomere negative	meta-analysis	SPPL2C	17	rs28768976	43688317	A	0.770677	-0.268112	0.044553	1.7678e-09	33512.6	0.774945	-0.268112	0.0445764	1.80262e-09	0	NA	NA	0.972005
sarcomere negative	meta-analysis	PRKCA	17	rs7210446	64307014	G	0.41789	-0.232927	0.042915	5.71053e-08	26241.1	0.418994	-0.232927	0.0429383	5.80535e-08	0	intron_variant	MODIFIER	0.829333
sarcomere negative	meta-analysis	FHOD3	18	rs617207	34244842	A	0.29061	0.429603	0.041429	3.40876e-25	33154.4	0.281009	0.393213	0.0418682	5.90366e-21	-0.17289	intron_variant	MODIFIER	0.939987
sarcomere negative	meta-analysis	FHOD3	18	rs118060942	34280732	C	0.987769	-1.03595	0.131915	4.05551e-15	55919.3	0.988603	-0.869454	0.133172	6.62923e-11	0	intron_variant	MODIFIER	0.951191
sarcomere negative	meta-analysis	DMPK	19	rs8106955	46346330	T	0.3119	-0.210051	0.042381	7.18653e-07	30506.6	0.318101	-0.210051	0.0423974	7.25759e-07	0	non_coding_transcript_exon_variant	MODIFIER	0.999916
sarcomere negative	meta-analysis	STRN	2	rs2003585	37123383	T	0.493221	0.207463	0.039328	1.32613e-07	30415.3	0.465095	0.207463	0.0393453	1.34304e-07	0	intron_variant	MODIFIER	0.968317
sarcomere negative	meta-analysis	TTN	2	rs17362588	179721046	G	0.91587	-0.346499	0.064389	7.3934e-08	36813	0.912308	-0.346499	0.0644134	7.47776e-08	0	missense_variant	MODERATE	0.998563
sarcomere negative	meta-analysis	MMP11	22	rs6003909	24181652	A	0.189508	0.405607	0.045022	2.07784e-19	37721.7	0.172651	0.405607	0.0450698	2.26692e-19	0	upstream_gene_variant	MODIFIER	0.998108
sarcomere negative	meta-analysis	SLC6A6	3	rs9843704	14297304	C	0.783416	0.320659	0.052819	1.27193e-09	24826.3	0.779878	0.320659	0.0528571	1.30709e-09	0	intergenic_variant	MODIFIER	0.896036
sarcomere negative	meta-analysis	MITF	3	rs62253180	69906572	A	0.816541	-0.254563	0.049716	3.0498e-07	31760.3	0.813147	-0.254563	0.0497357	3.08282e-07	0	intron_variant	MODIFIER	0.927966
sarcomere negative	meta-analysis	FNDC3B	3	rs4894803	171800256	A	0.595845	-0.221609	0.042405	1.73206e-07	27152	0.594076	-0.221609	0.0424255	1.75591e-07	0	intron_variant	MODIFIER	0.830674
sarcomere negative	meta-analysis	CCDC112	5	rs73780096	114621011	C	0.936619	0.448366	0.086425	2.12656e-07	26516.3	0.942222	0.448366	0.0864672	2.15567e-07	0	intron_variant	MODIFIER	0.93566
sarcomere negative	meta-analysis	CDKN1A	6	rs3176326	36647289	G	0.788407	-0.255251	0.04477	1.18838e-08	35166.1	0.804375	-0.255251	0.0447901	1.20631e-08	0	intron_variant	MODIFIER	0.961053
sarcomere negative	meta-analysis	PLN	6	rs28436726	118664854	G	0.937595	-0.437145	0.07076	6.49785e-10	40135.3	0.942181	-0.490679	0.0715519	6.99942e-12	0.162583	intergenic_variant	MODIFIER	0.953438
sarcomere negative	meta-analysis	PLN	6	rs3890198	118706447	T	0.478911	0.151909	0.038403	7.63254e-05	31962.6	0.463669	0.191693	0.0388236	7.91108e-07	0.00621139	intergenic_variant	MODIFIER	0.980227
sarcomere negative	meta-analysis	TRDN	6	rs9320939	123818871	G	0.516614	-0.18585	0.03867	1.5394e-06	31493.8	0.505862	-0.188806	0.0386854	1.05789e-06	0	intron_variant	MODIFIER	0.965024
sarcomere positive	HCMR vs. UKBB	HSPB7	1	rs2015509	16358148	T	0.3293	0.2618	0.05376	1.12e-06	24290.6	0.330411	0.2618	0.0537851	1.13e-06	0	intron_variant	MODIFIER	0.95415
sarcomere positive	HCMR vs. UKBB	MUC6	11	rs35469308	1016869	A	0.8397	-0.5771	0.09822	4.21e-09	11918.1	0.909673	-0.5771	0.098358	4.43e-09	0	missense_variant	MODERATE	0.401963
sarcomere positive	HCMR vs. UKBB	PRDM11*	11	rs11038225	44976681	G	0.90971	-0.4333	0.09014	1.53e-06	23232.3	0.914533	-0.44723	0.0901897	7.09e-07	-0.00473152	upstream_gene_variant	MODIFIER	0.761562
sarcomere positive	HCMR vs. UKBB	AC103855.3*	11	rs74605438	45522618	C	0.98705	-1.194	0.1743	7.37e-12	39919	0.988175	-1.13643	0.175013	8.39e-11	0.0941927	intron_variant	MODIFIER	0.676777
sarcomere positive	HCMR vs. UKBB	PHF21A*	11	rs34225581	46097595	A	0.93204	-0.5472	0.08938	9.23e-10	30633.5	0.932324	-0.51814	0.0897584	7.81e-09	-0.0259818	intron_variant	MODIFIER	0.915501
sarcomere positive	HCMR vs. UKBB	AMBRA1*	11	rs142929136	46513743	T	0.9867	-1.306	0.1572	9.74e-17	47788.5	0.986589	-1.35741	0.157377	6.4e-18	-0.0131043	intron_variant	MODIFIER	0.785592
sarcomere positive	HCMR vs. UKBB	TRIM64C*	11	rs117461622	49110043	T	0.98704	-0.9524	0.1869	3.47e-07	34706.6	0.988603	-1.0206	0.187028	4.84e-08	-0.0159473	upstream_gene_variant	MODIFIER	0.608948
sarcomere positive	HCMR vs. UKBB	OR5AK2*	11	rs139913353	56701515	T	0.98773	-1.248	0.1725	4.66e-13	42983.6	0.988029	-1.29693	0.172661	5.85e-14	-0.00988539	intergenic_variant	MODIFIER	0.696651
sarcomere positive	HCMR vs. UKBB	TNKS1BP1*	11	rs151252290	57076524	C	0.98146	-0.7143	0.1508	2.17e-06	37484.3	0.981481	-0.737284	0.150884	1.03e-06	-0.0186822	missense_variant	MODERATE	0.929174
sarcomere positive	HCMR vs. UKBB	P2RX3*	11	rs116897257	57137809	C	0.9769	-0.6373	0.1367	3.13e-06	36782.3	0.978893	-0.668893	0.136782	1.01e-06	0.000337825	3_prime_UTR_variant	MODIFIER	0.914563
sarcomere positive	HCMR vs. UKBB	OR9Q1*	11	rs78631951	57917265	C	0.98424	-1.012	0.1507	1.88e-11	44011.3	0.98398	-1.03105	0.150805	8.09e-12	0	intron_variant	MODIFIER	0.894475
sarcomere positive	HCMR vs. UKBB	TXNRD1	12	rs12299450	104658886	T	0.94603	-0.5373	0.1012	1.1e-07	29652.8	0.948529	-0.5373	0.101246	1.12e-07	0	intron_variant	MODIFIER	0.863824
sarcomere positive	HCMR vs. UKBB	MTUS2	13	rs2758215	29537036	G	0.0913	0.4342	0.07749	2.1e-08	31122.6	0.0927879	0.4342	0.0775278	2.14e-08	0	intron_variant	MODIFIER	0.977461
sarcomere positive	HCMR vs. UKBB	RBFOX1	16	rs60247077	5287275	T	0.7505	-0.2752	0.05571	7.82e-07	26681.7	0.761329	-0.2752	0.0557344	7.9e-07	0	upstream_gene_variant	MODIFIER	0.993991
sarcomere positive	HCMR vs. UKBB	C17orf112	17	rs186910954	51364578	A	0.98419	-0.9705	0.1966	7.96e-07	25781.7	0.983441	-0.9705	0.196689	8.05e-07	0	intergenic_variant	MODIFIER	0.542002
sarcomere positive	HCMR vs. UKBB	ABCA5	17	rs76905625	67322589	C	0.98457	-0.8478	0.1721	8.38e-07	34467.9	0.9839	-0.8478	0.172158	8.46e-07	0	intron_variant	MODIFIER	0.71885
sarcomere positive	HCMR vs. UKBB	GTF2A1L	2	rs35258848	48851517	T	0.8709	-0.3635	0.07344	7.44e-07	25569.6	0.877035	-0.3635	0.0734737	7.52e-07	0	intron_variant	MODIFIER	0.890932
sarcomere positive	HCMR vs. UKBB	NCKAP5-AS1	2	rs189654928	133777292	C	0.98867	-1.014	0.1866	5.51e-08	39761.8	0.989189	-1.014	0.186667	5.57e-08	0	intron_variant	MODIFIER	0.752247
sarcomere positive	HCMR vs. UKBB	AC093831.1	4	rs2312403	131847994	C	0.4384	-0.2819	0.05643	5.87e-07	19771.5	0.435311	-0.2819	0.0564642	5.96e-07	0	intergenic_variant	MODIFIER	0.88414
sarcomere positive	HCMR vs. UKBB	FLNC	7	rs76600480	128549878	C	0.97417	-0.6898	0.1382	6e-07	32269	0.972742	-0.6898	0.138251	6.05e-07	0	intron_variant	MODIFIER	0.817963
European	BRRD vs. BRRD	INTS7	1	rs112269880	212322006	A	0.97471	-1.861	0.3704	5.05277e-07	4298.71	0.972165	-1.861	0.371443	5.43764e-07	0	intergenic_variant	MODIFIER	NA
European	BRRD vs. BRRD	BAG3	10	rs61869036	121422836	G	0.7905	-0.6976	0.1313	1.07821e-07	5093.5	0.785721	-0.6976	0.13165	1.16516e-07	0	intron_variant	MODIFIER	NA
European	BRRD vs. BRRD	FHOD3	18	rs12605417	34294896	C	0.6567	-0.5807	0.1087	9.18119e-08	5460.88	0.660933	-0.5807	0.108974	9.88602e-08	0	intron_variant	MODIFIER	NA
European	BRRD vs. BRRD	YTHDC2	5	rs139472654	113041969	C	0.9748	-1.918	0.3756	3.28187e-07	4193.63	0.974105	-1.918	0.376721	3.55623e-07	0	intergenic_variant	MODIFIER	NA
European	meta-analysis	HSPB7	1	rs10803407	16358932	T	0.335186	0.233223	0.033521	3.46317e-12	55273	0.330324	0.233223	0.0335354	3.53721e-12	0	splice_region_variant,intron_variant	LOW	0.958241
European	meta-analysis	ADARB2	10	rs181181877	1494816	C	0.018425	1.3187	0.273688	1.44813e-06	10202.8	0.0104233	1.3187	0.273986	1.48661e-06	0	intron_variant	MODIFIER	NA
European	meta-analysis	MYOZ1	10	rs9664186	75409992	T	0.357927	0.179838	0.036659	9.30955e-07	44827.2	0.346776	0.179838	0.0366684	9.36958e-07	0	intron_variant	MODIFIER	0.784199
European	meta-analysis	BAG3	10	rs61869036	121422836	G	0.782913	-0.34914	0.03683	2.54839e-21	59994.5	0.785721	-0.34914	0.0368573	2.72548e-21	0	intron_variant	MODIFIER	0.981599
European	meta-analysis	PRDM11*	11	rs75762132	45028136	G	0.984346	-0.613252	0.12211	5.11022e-07	60263.6	0.98769	-0.613252	0.122135	5.13714e-07	0	upstream_gene_variant	MODIFIER	0.690952
European	meta-analysis	TBX3	12	rs7977151	115362972	A	0.29686	-0.198423	0.037051	8.53664e-08	48312.9	0.300896	-0.198423	0.0370616	8.60934e-08	0	downstream_gene_variant	MODIFIER	0.979612
European	meta-analysis	ADPRHL1	13	rs41306688	114078558	A	0.965335	-0.481867	0.085812	1.96131e-08	56182.8	0.965913	-0.481867	0.0858353	1.97868e-08	0	missense_variant	MODERATE	0.717659
European	meta-analysis	CHRNB4	15	rs6495317	78991716	A	0.782775	-0.209072	0.037019	1.62614e-08	59413.2	0.787096	-0.209633	0.0370288	1.50176e-08	-0.00287388	intron_variant,non_coding_transcript_variant	MODIFIER	0.997948
European	meta-analysis	ALPK3	15	rs77523699	85199921	C	0.916439	-0.290151	0.054602	1.07288e-07	60643.7	0.914879	-0.291031	0.0546145	9.88551e-08	0	upstream_gene_variant	MODIFIER	0.965035
European	meta-analysis	SPPL2C	17	rs17769552	43927290	G	0.778123	-0.218933	0.03698	3.21339e-09	58635.2	0.779295	-0.218933	0.0369907	3.24713e-09	0	intron_variant,non_coding_transcript_variant	MODIFIER	0.988358
European	meta-analysis	FHOD3	18	rs72891799	34089093	C	0.989492	-0.712762	0.142982	6.19691e-07	65140.5	0.988955	-0.691009	0.14305	1.36159e-06	-0.00670681	intron_variant	MODIFIER	0.732565
European	meta-analysis	FHOD3	18	rs118060942	34280732	C	0.987301	-0.735993	0.113252	8.10064e-11	86096.6	0.988603	-0.626613	0.114127	4.00812e-08	0.150246	intron_variant	MODIFIER	0.964542
European	meta-analysis	FHOD3	18	rs4477795	34292366	C	0.655013	-0.296297	0.033012	2.82239e-19	56168.6	0.658574	-0.270527	0.0332905	4.42747e-16	0	intron_variant	MODIFIER	0.986103
European	meta-analysis	AZU1	19	rs115172026	779398	T	0.859021	-0.212596	0.04404	1.3837e-06	58950.6	0.861263	-0.212596	0.0440483	1.39005e-06	0	upstream_gene_variant	MODIFIER	0.989662
European	meta-analysis	STRN	2	rs17443495	37117502	G	0.575805	-0.172767	0.03236	9.35091e-08	54128.5	0.581905	-0.172767	0.0323682	9.42108e-08	0	intron_variant	MODIFIER	0.974036
European	meta-analysis	PRKRA	2	rs117491478	179243332	G	0.988036	-0.839297	0.13762	1.06964e-09	61835.6	0.987891	-0.839297	0.13766	1.08164e-09	0	intron_variant	MODIFIER	0.699977
European	meta-analysis	MMP11	22	rs2267038	24169196	G	0.191807	0.244824	0.039191	4.1856e-10	58139.2	0.186553	0.244824	0.0392038	4.24064e-10	0	intron_variant	MODIFIER	0.951053
European	meta-analysis	SLC6A6	3	rs13061705	14291129	C	0.674862	0.189851	0.037351	3.71736e-07	45225.1	0.675763	0.189851	0.0373613	3.74477e-07	0	regulatory_region_variant	MODIFIER	0.860325
European	meta-analysis	AK098570	5	rs66761011	29426502	A	0.82422	-0.369785	0.063294	5.14729e-09	23832.2	0.916658	-0.369785	0.063338	5.27418e-09	0	intergenic_variant	MODIFIER	0.416873
European	meta-analysis	PROB1	5	rs10052399	138668504	T	0.258676	0.192255	0.037921	3.98062e-07	50207.4	0.249749	0.192255	0.0379303	4.00678e-07	0	downstream_gene_variant	MODIFIER	0.846699
European	meta-analysis	CDKN1A	6	rs56100429	36616600	C	0.720496	-0.202986	0.035382	9.63768e-09	54912.1	0.725578	-0.202986	0.0353923	9.73292e-09	0	regulatory_region_variant	MODIFIER	0.933231
European	meta-analysis	PLN	6	rs28436726	118664854	G	0.940661	-0.364554	0.060672	1.87128e-09	67379.7	0.942181	-0.364554	0.0606878	1.88942e-09	0	intergenic_variant	MODIFIER	0.968731
European	meta-analysis	RAPGEF1,POMT1	9	rs734638	134489810	C	0.702571	-0.177047	0.034692	3.33613e-07	55052.3	0.704562	-0.177047	0.0346999	3.35665e-07	0	intron_variant	MODIFIER	0.952319
European	HCMR vs. UKBB	HSPB7	1	rs10803407	16358932	T	0.3364	0.2775	0.03818	3.643e-13	44761.8	0.330324	0.2775	0.0382021	3.7581e-13	0	splice_region_variant,intron_variant	LOW	0.958241
European	HCMR vs. UKBB	BAG3	10	rs2234962	121429633	T	0.7832	-0.3705	0.04096	1.49104e-19	51110.1	0.783708	-0.3705	0.0409924	1.59175e-19	0	missense_variant	MODERATE	0.999042
European	HCMR vs. UKBB	OR5AK2*	11	rs186327160	51323952	T	0.98842	-0.9168	0.1609	1.21257e-08	49181.8	0.989043	-0.926036	0.160963	8.7624e-09	-0.0132149	intergenic_variant	MODIFIER	0.532215
European	HCMR vs. UKBB	OR9Q1*	11	rs78631951	57917265	C	0.98343	-0.5773	0.1222	2.30997e-06	59907.6	0.98398	-0.58572	0.122231	1.65185e-06	0	intron_variant	MODIFIER	0.904818
European	HCMR vs. UKBB	TBX3	12	rs7300371	115371181	T	0.2654	-0.247	0.04493	3.85343e-08	37023.5	0.268836	-0.247	0.0449477	3.90108e-08	0	upstream_gene_variant	MODIFIER	0.985097
European	HCMR vs. UKBB	ADPRHL1	13	rs41306688	114078558	A	0.96529	-0.5701	0.09752	5.03594e-09	45733	0.965913	-0.5701	0.0975554	5.10046e-09	0	missense_variant	MODERATE	0.717659
European	HCMR vs. UKBB	ADAMTS7	15	rs1114829	78989821	G	0.7824	-0.2051	0.0418	9.26222e-07	49000.4	0.78696	-0.204132	0.0418102	1.04837e-06	0.00468894	intron_variant,non_coding_transcript_variant	MODIFIER	0.997588
European	HCMR vs. UKBB	ALPK3	15	rs11073663	85260268	A	0.5453	-0.194	0.03677	1.32005e-07	43473.9	0.543705	-0.192878	0.0367818	1.57264e-07	0.00197727	upstream_gene_variant	MODIFIER	0.985984
European	HCMR vs. UKBB	SLCO3A1	15	rs143720580	92344418	G	0.98786	-0.7579	0.1507	4.92538e-07	53518.9	0.989469	-0.756491	0.150734	5.20215e-07	0	intergenic_variant	MODIFIER	0.645511
European	HCMR vs. UKBB	SPPL2C	17	rs7502280	43670221	T	0.8862	-0.3956	0.06493	1.11011e-09	34262.8	0.928669	-0.3956	0.0649642	1.13259e-09	0	non_coding_transcript_exon_variant	MODIFIER	0.605221
European	HCMR vs. UKBB	ABCA5	17	rs79000044	67264572	A	0.98496	-0.6518	0.1358	1.58899e-06	53358	0.986327	-0.6518	0.135828	1.59687e-06	0	intron_variant	MODIFIER	0.709379
European	HCMR vs. UKBB	FHOD3	18	rs118060942	34280732	C	0.98733	-0.8039	0.1221	4.58119e-11	78151.8	0.988603	-0.699965	0.122948	1.2468e-08	0.150246	intron_variant	MODIFIER	0.964542
European	HCMR vs. UKBB	FHOD3	18	rs4477795	34292366	C	0.6556	-0.3031	0.03756	7.04393e-16	45717.5	0.658574	-0.278346	0.037837	1.88863e-13	0	intron_variant	MODIFIER	0.986103
European	HCMR vs. UKBB	STRN	2	rs1861435	37075013	T	0.5737	-0.2026	0.03674	3.49921e-08	44144.5	0.577108	-0.2026	0.0367522	3.53592e-08	0	3_prime_UTR_variant	MODIFIER	0.99008
European	HCMR vs. UKBB	SPP2	2	rs75944971	235176438	C	0.94796	-0.4083	0.08163	5.67864e-07	44338.7	0.95422	-0.4083	0.0816521	5.71868e-07	0	regulatory_region_variant	MODIFIER	0.792935
European	HCMR vs. UKBB	MMP11	22	rs2267038	24169196	G	0.1922	0.2731	0.04443	7.90878e-10	47544.4	0.186553	0.2731	0.0444472	8.02808e-10	0	intron_variant	MODIFIER	0.951053
European	HCMR vs. UKBB	SLC6A6	3	rs13061705	14291129	C	0.6757	0.2293	0.04437	2.36731e-07	33778.1	0.675763	0.2293	0.0443869	2.39232e-07	0	regulatory_region_variant	MODIFIER	0.860325
European	HCMR vs. UKBB	FNDC3B	3	rs4894803	171800256	A	0.5851	-0.2092	0.04016	1.89694e-07	37220.2	0.594076	-0.2092	0.0401741	1.91572e-07	0	intron_variant	MODIFIER	0.840939
European	HCMR vs. UKBB	AK098570	5	rs66761011	29426502	A	0.8252	-0.3957	0.06812	6.28971e-09	21754.1	0.916658	-0.3957	0.0681712	6.45583e-09	0	intergenic_variant	MODIFIER	0.416873
European	HCMR vs. UKBB	CDKN1A	6	rs56100429	36616600	C	0.7195	-0.2267	0.04028	1.82202e-08	44504.4	0.725578	-0.2267	0.0402939	1.8426e-08	0	regulatory_region_variant	MODIFIER	0.933231
European	HCMR vs. UKBB	PLN	6	rs12212795	118654308	G	0.94589	-0.4533	0.06892	4.79419e-11	59941.8	0.946361	-0.4533	0.0689443	4.86945e-11	0	intergenic_variant	MODIFIER	0.998867
European	HCMR vs. UKBB	RAPGEF1,POMT1	9	rs877373	134610239	C	0.7098	-0.1897	0.03924	1.3358e-06	45956	0.708475	-0.1897	0.0392495	1.34372e-06	0	intron_variant	MODIFIER	0.979398

## Sheet: S3
Supplementary Table 3: Meta-analysis summary statistics for lead variants <%5 LFDR threshold derived from the all-comer HCM meta-analysis performed in GWAMA and replication analysis. CHR: chromosome; POS: position; EA: effect allele; NEA: non-effect allele; EAF: effect allele frequency; b: beta; se: standard error; z: z-statistic; p: p-value derived from a fixed-effects inverse-variance meta-anal…
								Discovery (HCMR vs. UKBB & BRRD vs. BRRD)												Replication (Netherlands-Canada-RBH excluding HCMR-BRRD cases)						Overall Heterogeneity
Locus name	SNP	VEP annotation variant type	VEP Impact	CHR	POS	EA	NEA	EAF	b	se	z	p	qvalues	FDR	Q_statistic	Q_p.value	n_studies	n_samples	HCMR-BRRD effects	EAF	b	se	p_replication	n_studies	N-C-R effects	Cochran Q-statistic	P-value
Genome-wide signifiicant variants (p-value < 5 × 10-8)
HSPB7	rs1048302	3_prime_UTR_variant	MODIFIER	1	16340879	T	G	0.324764	0.276737	0.032664	8.47232	2.54e-17	3.18e-12	2.73e-05	0.027308	0.868746	2	50266	++	0.3421	0.2294	0.0432	1.055e-07	3	+++	0.784207	0.375858
SLC6A6	rs13061705	intergenic_variant	MODIFIER	3	14291129	C	T	0.686625	0.224098	0.038976	5.74965	9.18e-09	2.93e-05	2.73e-05	0.00464	0.945694	2	50266	++	0.6818	0.1261	0.0444	0.004494	3	+++	2.77813	0.0955596
CDKN1A	rs3176326	intron_variant	MODIFIER	6	36647289	G	A	0.791378	-0.246957	0.036882	-6.6958	2.22e-11	5.13e-07	2.73e-05	0.001359	0.970593	2	50266	--	0.78	-0.2377	0.0499	1.873e-06	3	---	0.0209356	0.884955
PLN	rs12212795	intergenic_variant	MODIFIER	6	118654308	G	C	0.946888	-0.392746	0.062034	-6.3311	2.51e-10	9.46e-07	2.73e-05	4.41096	0.035709	2	50266	-+	0.9422	-0.543	0.0884	8.186e-10	3	---	1.94166	0.163488
BAG3	rs72840788	intron_variant	MODIFIER	10	121415685	G	A	0.792188	-0.420873	0.037619	-11.1877	5.06e-29	1.22e-22	2.73e-05	3.31808	0.068522	2	50266	--	0.7651	-0.3502	0.0485	4.899e-13	3	---	1.31105	0.252204
TBX3	rs7301677	intergenic_variant	MODIFIER	12	115381147	C	T	0.731933	0.213645	0.037506	5.69625	1.26e-08	3.99e-05	4.04e-05	2.54682	0.110516	2	50266	++	0.7459	0.174	0.0478	0.0002737	3	+++	0.426894	0.513517
ADPRHL1	rs41306688	missense_variant	MODERATE	13	114078558	A	C	0.96687	-0.601043	0.088384	-6.80036	1.08e-11	2.66e-07	2.73e-05	0.150564	0.697997	2	50266	--	0.9654	-0.3216	0.1146	0.005029	3	---	3.71219	0.0540163
ALPK3	rs8033459	intron_variant	MODIFIER	15	85253258	C	T	0.529167	-0.189921	0.032107	-5.91524	3.41e-09	1.11e-05	2.73e-05	0.478565	0.489073	2	50266	--	0.5472	-0.1663	0.0412	5.488e-05	3	---	0.212939	0.644473
SPPL2C	rs28768976	downstream_gene_variant	MODIFIER	17	43688317	A	G	0.772212	-0.254994	0.036752	-6.93832	4.12e-12	1.08e-07	2.73e-05	0.990616	0.319592	2	50266	--	0.7589	-0.2551	0.0492	2.112e-07	3	---	8.81831e-15	1
PRKCA	rs7210446	intron_variant	MODIFIER	17	64307014	G	A	0.419359	-0.219756	0.035588	-6.17501	6.82e-10	2.29e-06	2.73e-05	0.166197	0.683514	2	50266	--	0.417	-0.2214	0.0414	8.926e-08	3	---	0.00033591	0.985377
FHOD3	rs4799426	intron_variant	MODIFIER	18	34280891	A	G	0.654856	-0.320945	0.032384	-9.91055	4e-23	3.75e-17	2.73e-05	5.6108	0.01785	2	50266	--	0.6665	-0.3633	0.0438	1.128e-16	3	---	0.595946	0.440129
FHOD3	rs118060942	intron_variant	MODIFIER	18	34280732	C	T	0.987906	-0.798616	0.114531	-6.97291	3.23e-12	8.51e-08	2.73e-05	0.626605	0.428603	2	50266	--	0.9885	-0.9922	0.2062	1.494e-06	3	---	0.669212	0.413327
MMP11	rs2070458	intron_variant	MODIFIER	22	24159307	A	T	0.219102	0.292886	0.037606	7.78826	7.12e-15	4.73e-10	2.73e-05	0.060187	0.806201	2	50266	++	0.2175	0.2214	0.0529	2.808e-05	3	---	1.2189	0.269576
<5% FDR variants (p-value < 1.82 × 10-6)
STRN	rs2003585	intron_variant	MODIFIER	2	37123383	T	C	0.489832	0.173631	0.032405	5.35813	8.6e-08	0.00024523	0.00394588	0.368209	0.543982	2	50266	++	0.4923	0.1055	0.0416	0.01115	3	++-	1.65854	0.197801
E2F6,ROCK2	rs7556984	intron_variant	MODIFIER	2	11599732	G	A	0.663224	0.185746	0.036986	5.02207	5.21e-07	0.00134554	0.0179474	1.01019	0.314856	2	50266	++	0.6658	0.0872	0.0444	0.04942	3	+-+	2.96551	0.0850578
TTN	rs62177303	intron_variant	MODIFIER	2	179768624	C	T	0.614183	0.174706	0.035189	4.9648	7e-07	0.00177095	0.0192162	0.055479	0.81379	2	50266	++	0.5976	0.1121	0.0421	0.00779	3	+++	1.32787	0.249185
FNDC3B	rs4894803	intron_variant	MODIFIER	3	171800256	A	G	0.59661	-0.179213	0.035156	-5.09767	3.51e-07	0.000928965	0.01549	0.249151	0.617673	2	50266	--	0.5848	-0.2	0.0453	9.911e-06	3	---	0.135692	0.712602
PROB1	rs10052399	downstream_gene_variant	MODIFIER	5	138668504	T	C	0.264204	0.206369	0.038098	5.41679	6.21e-08	0.00018112	0.00312126	6.15221	0.013125	2	50266	++	0.2645	0.2357	0.0513	4.416e-06	3	+++	0.222497	0.637144
AK098570	rs66761011	intergenic_variant	MODIFIER	5	29426502	A	G	0.8298	-0.3486	0.066244	-5.26237	1.45e-07	0.000402317	0.00766847	0	1	1	42824	-?	0.7591	0.0502	0.0777	0.5184	2	+-?	15.2491	9.42198e-05
TRDN	rs9320939	intron_variant	MODIFIER	6	123818871	G	A	0.517177	-0.173712	0.031994	-5.42946	5.78e-08	0.000170049	0.00284629	1e-06	0.999202	2	50266	--	0.5083	-0.0831	0.0414	0.04475	3	--+	3.06137	0.0801742
MTSS1	rs7003871	intron_variant	MODIFIER	8	125851510	C	T	0.336482	0.169008	0.034705	4.86988	1.14e-06	0.00273639	0.0284285	0.061239	0.804548	2	50266	++	0.3439	0.0881	0.0434	0.04208	3	+-+	2.13435	0.144031
RAPGEF1,POMT1	rs734638	intron_variant	MODIFIER	9	134489810	C	G	0.712518	-0.186446	0.035083	-5.3144	1.09e-07	0.000307489	0.00504537	0.537192	0.463599	2	50266	--	0.6981	-0.0439	0.0458	0.3386	3	---	6.03532	0.0140224
TCF7L2	rs11196085	intron_variant	MODIFIER	10	114505037	T	C	0.721152	-0.189678	0.035206	-5.3876	7.3e-08	0.000209935	0.00356214	0.247837	0.618602	2	50266	--	0.7448	-0.22	0.0463	1.993e-06	3	---	0.26938	0.603748
OR5AK2	rs78310129	upstream_gene_variant	MODIFIER	11	56793878	C	T	0.98778	-0.7679	0.140914	-5.44941	5.17e-08	0.000153279	0.00233825	0	1	1	42824	-?	0.0365	1.5433	0.1309	4.6e-32	3	++-	144.18	3.24493e-33
CYP2R1	rs1390519	intron_variant	MODIFIER	11	14928023	A	G	0.6664	-0.2027	0.041652	-4.86649	1.16e-06	0.00278044	0.0289948	0	1	1	42824	-?	0.6524	-0.1372	0.0609	0.02437	2	--?	0.794166	0.372843
SSPN	rs1480036	intron_variant	MODIFIER	12	26344726	T	C	0.235801	-0.210931	0.041377	-5.09784	3.5e-07	0.000926609	0.0154603	0.993296	0.318938	2	50266	--	0.233	-0.0558	0.0496	0.2604	3	---	5.74623	0.0165241
CHRNB4	rs1814880	intron_variant	MODIFIER	15	79021140	T	C	0.262658	0.179413	0.034204	5.24538	1.59e-07	0.000439283	0.00871215	0.104683	0.746281	2	50266	++	0.2481	0.135	0.0479	0.004836	3	+++	0.559538	0.454447
AZU1	rs117710064	upstream_gene_variant	MODIFIER	19	779606	C	T	0.865411	-0.222253	0.045118	-4.926	8.55e-07	0.00211055	0.0215938	0.823034	0.364295	2	50266	--	0.8238	0.0059	0.0732	0.936	3	-++	7.06881	0.00784375

## Sheet: S4
Supplementary Table 4: Summary statistics for variants deemed independent following a COJO analysis, from the multi-ancestry all comer HCM meta-analysis. cis-eQTL and sQTL data derived from GTEx v8.0. Chromatin interactions (Hi-C) obtained for SNPs demonstrating genome-wide significance from GSE87112. NEA: Non-effect allele; EA: Effect allele; CI: confidence interval; NES: normalized effect size;…
Chr	SNP	Position (GRCh37)	NEA/EA	Freq EA	OR [95% CI]	P-value	Locus name	cis-eQTL (GTEx v8.0)				cis-sQTL (GTEx v8.0)				Chromosomal conformation (Hi-C using GSE87112)
								Gene	P-value	NES	Tissue	Gene	P-value	NES	Tissue	Region1 (location of lead SNP)	Region2 (location of promoter 250bp upstream and 500bp downstream of transcription start site)	FDR	Tissue	Cell type	ENSG	Gene name	Gene type
GWAS significant (p-value < 5 × 10-8)
1	rs1048302	16340879	G/T	0.33	1.32 [1.24-1.40]	2.54e-17	HSPB7	CLCNKA	2.6e-38	0.55	Muscle - Skeletal	HSPB7	2.2e-25	0.41	Heart - Left Ventricle	1:16200001-16240000	1:16280001-16320000	8.07379e-12	Left_Ventricle	E104, E105	ENSG00000116809:ENSG00000234607:ENSG00000231353:ENSG00000224966	NA	NA
								HSPB7	2.2e-09	-0.13	Muscle - Skeletal	HSPB7	8.3e-08	0.34	Heart - Atrial Appendage	1:16280001-16320000	1:16200001-16240000	8.07379e-12	Left_Ventricle	E083, E095, E104, E105	ENSG00000238818	snoU13	snoRNA
								CLCNKA	1.9e-07	0.37	Heart - Left Ventricle	HSPB7	2e-06	-0.23	Muscle - Skeletal	1:16120001-16160000	1:16240001-16280000	7.3569e-11	Left_Ventricle	NA	ENSG00000270620	AL034555.1	unprocessed_pseudogene
																1:16240001-16280000	1:16120001-16160000	7.3569e-11	Left_Ventricle	E083, E095, E105	ENSG00000233954:ENSG00000178715	NA	NA
																1:16240001-16280000	1:15920001-15960000	1.12231e-10	Left_Ventricle	E083, E104, E105, E095	ENSG00000237301:ENSG00000235084:ENSG00000252417:ENSG00000236500:ENSG00000197312	NA	NA
																1:16200001-16240000	1:16240001-16280000	1.5657e-10	Left_Ventricle	NA	ENSG00000270620	AL034555.1	unprocessed_pseudogene
																1:16240001-16280000	1:16200001-16240000	1.5657e-10	Left_Ventricle	E083, E095, E104, E105	ENSG00000238818	snoU13	snoRNA
																1:16200001-16240000	1:16160001-16200000	1.41724e-07	Left_Ventricle	E083, E095, E105, E104	ENSG00000179743:ENSG00000065526	NA	NA
																1:16160001-16200000	1:16200001-16240000	1.41724e-07	Left_Ventricle	E083, E095, E104, E105	ENSG00000238818	snoU13	snoRNA
																1:16280001-16320000	1:15920001-15960000	1.84253e-07	Left_Ventricle	E083, E104, E105, E095	ENSG00000237301:ENSG00000235084:ENSG00000252417:ENSG00000236500:ENSG00000197312	NA	NA
																1:16160001-16200000	1:15920001-15960000	2.32297e-07	Left_Ventricle	E083, E104, E105, E095	ENSG00000237301:ENSG00000235084:ENSG00000252417:ENSG00000236500:ENSG00000197312	NA	NA
																1:16240001-16280000	1:15960001-16000000	8.11088e-07	Left_Ventricle	NA	ENSG00000215695	RSC1A1	protein_coding
3	rs13061705	14291129	T/C	0.69	1.25 [1.16-1.34]	9.18e-09	SLC6A6
6	rs3176326	36647289	G/A	0.21	1.28 [1.19-1.38]	2.22e-11	CDKN1A	CDKN1A	1.4e-05	-0.12	Muscle - Skeletal
6	rs12212795	118654308	G/C	0.05	1.48 [1.31-1.67]	2.51e-10	PLN									6:118600001-118640000	6:118840001-118880000	5.41729e-34	Left_Ventricle	E083, E104, E105, E095	ENSG00000198523	PLN	protein_coding
																6:118640001-118680000	6:118840001-118880000	9.52468e-32	Left_Ventricle	E083, E104, E105, E095	ENSG00000198523	PLN	protein_coding
																6:118560001-118600000	6:118280001-118320000	1.58608e-29	Left_Ventricle	NA	ENSG00000230202	AL450405.1	processed_pseudogene
																6:118920001-118960000	6:118280001-118320000	3.9702e-26	Left_Ventricle	NA	ENSG00000230202	AL450405.1	processed_pseudogene
																6:118520001-118560000	6:118280001-118320000	4.41328e-23	Left_Ventricle	NA	ENSG00000230202	AL450405.1	processed_pseudogene
																6:119000001-119040000	6:118280001-118320000	1.95831e-21	Left_Ventricle	NA	ENSG00000230202	AL450405.1	processed_pseudogene
																6:118800001-118840000	6:118280001-118320000	6.90196e-21	Left_Ventricle	NA	ENSG00000230202	AL450405.1	processed_pseudogene
																6:118880001-118920000	6:118280001-118320000	2.79257e-20	Left_Ventricle	NA	ENSG00000230202	AL450405.1	processed_pseudogene
																6:119000001-119040000	6:117760001-117800000	4.59742e-20	Left_Ventricle	NA	ENSG00000221434:ENSG00000226181:ENSG00000164465:ENSG00000207461	NA	NA
																6:118840001-118880000	6:118800001-118840000	7.83685e-19	Left_Ventricle	E083, E095, E104, E105	ENSG00000169075	Z99496.1	processed_pseudogene
																6:118800001-118840000	6:118840001-118880000	7.83685e-19	Left_Ventricle	E083, E104, E105, E095	ENSG00000198523	PLN	protein_coding
																6:118600001-118640000	6:118800001-118840000	1.49409e-16	Left_Ventricle	E083, E095, E104, E105	ENSG00000169075	Z99496.1	processed_pseudogene
																6:118720001-118760000	6:117760001-117800000	6.75591e-16	Left_Ventricle	NA	ENSG00000221434:ENSG00000226181:ENSG00000164465:ENSG00000207461	NA	NA
																6:118640001-118680000	6:118800001-118840000	8.11587e-13	Left_Ventricle	E083, E095, E104, E105	ENSG00000169075	Z99496.1	processed_pseudogene
																6:118720001-118760000	6:118760001-118800000	2.27397e-12	Left_Ventricle	E083	ENSG00000216809	AL589993.1	processed_pseudogene
																6:118680001-118720000	6:118800001-118840000	2.4664e-11	Left_Ventricle	E083, E095, E104, E105	ENSG00000169075	Z99496.1	processed_pseudogene
																6:118600001-118640000	6:118880001-118920000	4.53299e-11	Left_Ventricle	E104	ENSG00000217330	SSXP10	processed_pseudogene
																6:118560001-118600000	6:118200001-118240000	8.78486e-10	Left_Ventricle	E095, E104, E105	ENSG00000196376	SLC35F1	protein_coding
																6:118520001-118560000	6:117760001-117800000	3.59979e-09	Left_Ventricle	NA	ENSG00000221434:ENSG00000226181:ENSG00000164465:ENSG00000207461	NA	NA
																6:118560001-118600000	6:118280001-118320000	7.96385e-09	Right_Ventricle	NA	ENSG00000230202	AL450405.1	processed_pseudogene
																6:119000001-119040000	6:118200001-118240000	9.5853e-09	Left_Ventricle	E095, E104, E105	ENSG00000196376	SLC35F1	protein_coding
																6:118840001-118880000	6:118800001-118840000	2.03254e-08	Right_Ventricle	E083, E095, E104, E105	ENSG00000169075	Z99496.1	processed_pseudogene
																6:118800001-118840000	6:118840001-118880000	2.03254e-08	Right_Ventricle	E083, E104, E105, E095	ENSG00000198523	PLN	protein_coding
																6:118920001-118960000	6:117760001-117800000	2.66514e-08	Left_Ventricle	NA	ENSG00000221434:ENSG00000226181:ENSG00000164465:ENSG00000207461	NA	NA
																6:118560001-118600000	6:117760001-117800000	2.84334e-08	Left_Ventricle	NA	ENSG00000221434:ENSG00000226181:ENSG00000164465:ENSG00000207461	NA	NA
																6:118600001-118640000	6:118800001-118840000	4.07143e-08	Right_Ventricle	E083, E095, E104, E105	ENSG00000169075	Z99496.1	processed_pseudogene
																6:118840001-118880000	6:118280001-118320000	5.41986e-08	Left_Ventricle	NA	ENSG00000230202	AL450405.1	processed_pseudogene
																6:118640001-118680000	6:118280001-118320000	1.47053e-07	Left_Ventricle	NA	ENSG00000230202	AL450405.1	processed_pseudogene
																6:118920001-118960000	6:119000001-119040000	1.73617e-07	Left_Ventricle	E083, E095, E104, E105	ENSG00000111860	CEP85L	protein_coding
																6:119000001-119040000	6:117920001-117960000	3.92783e-07	Left_Ventricle	E083, E104, E105, E095	ENSG00000047932:ENSG00000218233	NA	NA
																6:118600001-118640000	6:118760001-118800000	4.91022e-07	Left_Ventricle	E083	ENSG00000216809	AL589993.1	processed_pseudogene
																6:118600001-118640000	6:118280001-118320000	7.01486e-07	Left_Ventricle	NA	ENSG00000230202	AL450405.1	processed_pseudogene
10	rs72840788	121415685	G/A	0.21	1.52 [1.42-1.64]	5.06e-29	BAG3					.				10:121600001-121640000	10:121360001-121400000	7.28562e-18	Left_Ventricle	NA	ENSG00000234569:ENSG00000227437	NA	NA
																10:121560001-121600000	10:119760001-119800000	7.39037e-10	Left_Ventricle	NA	ENSG00000231104	AC022395.1	lncRNA
																10:121600001-121640000	10:124120001-124160000	1.04397e-08	Left_Ventricle	E095, E104, E105, E083	ENSG00000107679	PLEKHA1	protein_coding
																10:121560001-121600000	10:121360001-121400000	1.73944e-08	Left_Ventricle	NA	ENSG00000234569:ENSG00000227437	NA	NA
																10:121360001-121400000	10:121560001-121600000	1.73944e-08	Left_Ventricle	NA	ENSG00000270300	PHACTR2P1	transcribed_processed_pseudogene
																10:121600001-121640000	10:120800001-120840000	2.07725e-08	Left_Ventricle	E083, E095, E104, E105	ENSG00000107581:ENSG00000207468:ENSG00000222588	NA	NA
																10:121600001-121640000	10:121320001-121360000	5.8378e-08	Left_Ventricle	E083, E095, E104, E105	ENSG00000271353:ENSG00000151923	NA	NA
																10:121360001-121400000	10:120760001-120800000	5.24798e-07	Left_Ventricle	E095, E104, E105, E083	ENSG00000229272:ENSG00000215925:ENSG00000188613	NA	NA
																10:121600001-121640000	10:120920001-120960000	6.7646e-07	Left_Ventricle	E083, E095, E104, E105	ENSG00000183605:ENSG00000165672	NA	NA
12	rs7301677	115381147	T/C	0.73	1.24 [1.15-1.33]	1.26e-08	TBX3									12:115320001-115360000	12:115720001-115760000	1.04076e-33	Left_Ventricle	NA	ENSG00000271579	AC078880.3	lncRNA
																12:115320001-115360000	12:116120001-116160000	1.83427e-24	Left_Ventricle	NA	ENSG00000240205	RN7SL865P	misc_RNA
																12:115320001-115360000	12:116160001-116200000	4.67284e-21	Left_Ventricle	NA	ENSG00000257781	AC009387.1	lncRNA
																12:115320001-115360000	12:115680001-115720000	8.18576e-18	Left_Ventricle	NA	ENSG00000257519	AC078880.1	lncRNA
																12:115320001-115360000	12:116360001-116400000	4.78974e-16	Left_Ventricle	NA	ENSG00000258034	AC012157.2	lncRNA
																12:115360001-115400000	12:116160001-116200000	4.54829e-12	Left_Ventricle	NA	ENSG00000257781	AC009387.1	lncRNA
																12:115320001-115360000	12:117280001-117320000	1.77403e-09	Left_Ventricle	E104, E095, E105, E083	ENSG00000135116	HRK	protein_coding
																12:115360001-115400000	12:115680001-115720000	5.01348e-09	Left_Ventricle	NA	ENSG00000257519	AC078880.1	lncRNA
																12:115320001-115360000	12:117160001-117200000	6.42678e-09	Left_Ventricle	E083, E095, E104, E105	ENSG00000111412:ENSG00000135119:ENSG00000239374	NA	NA
																12:115360001-115400000	12:116120001-116160000	7.63617e-09	Left_Ventricle	NA	ENSG00000240205	RN7SL865P	misc_RNA
																12:115360001-115400000	12:117400001-117440000	9.58341e-08	Left_Ventricle	E083	ENSG00000257279	AC127164.1	lncRNA
																12:115320001-115360000	12:116000001-116040000	9.75967e-08	Left_Ventricle	NA	ENSG00000258108:ENSG00000258280:ENSG00000241656	NA	NA
																12:115320001-115360000	12:117680001-117720000	2.48082e-07	Left_Ventricle	NA	ENSG00000257465	ELOCP32	processed_pseudogene
																12:115320001-115360000	12:115720001-115760000	2.64406e-07	Right_Ventricle	NA	ENSG00000271579	AC078880.3	lncRNA
																12:115320001-115360000	12:116160001-116200000	5.79022e-07	Right_Ventricle	NA	ENSG00000257781	AC009387.1	lncRNA
13	rs41306688	114078558	A/C	0.03	1.82 [1.53-2.17]	1.08e-11	ADPRHL1					.				13:114080001-114120000	13:114120001-114160000	1.89365e-29	Left_Ventricle	E083, E095, E104, E105	ENSG00000150401:ENSG00000233613:ENSG00000202347:ENSG00000150403	NA	NA
																13:114080001-114120000	13:114120001-114160000	1.13109e-16	Right_Ventricle	E083, E095, E104, E105	ENSG00000150401:ENSG00000233613:ENSG00000202347:ENSG00000150403	NA	NA
																13:114040001-114080000	13:114120001-114160000	1.66485e-13	Left_Ventricle	E083, E095, E104, E105	ENSG00000150401:ENSG00000233613:ENSG00000202347:ENSG00000150403	NA	NA
15	rs8033459	85253258	C/T	0.47	1.21 [1.14-1.29]	3.41e-09	ALPK3	ALPK3	2.1e-33	-0.25	Muscle - Skeletal	CSPG4P12	7e-12	0.56	Heart - Atrial Appendage	15:85160001-85200000	15:85360001-85400000	2.11984e-40	Left_Ventricle	E083, E095, E105, E104	ENSG00000136383:ENSG00000200991	NA	NA
								GOLGA2P7	7.8e-19	0.39	Muscle - Skeletal	UBE2Q2L	1.2e-07	-0.45	Heart - Atrial Appendage	15:85360001-85400000	15:85160001-85200000	2.11984e-40	Left_Ventricle	E095, E104, E105, E083	ENSG00000176700:ENSG00000254414:ENSG00000254779:ENSG00000177082	NA	NA
								UBE2Q2L	5.8e-12	0.47	Heart - Atrial Appendage					15:85360001-85400000	15:85200001-85240000	1.97669e-22	Left_Ventricle	E083	ENSG00000197696:ENSG00000259654	NA	NA
								GOLGA2P7	1.1e-11	0.35	Heart - Left Ventricle					15:85200001-85240000	15:85360001-85400000	1.97669e-22	Left_Ventricle	E083, E095, E105, E104	ENSG00000136383:ENSG00000200991	NA	NA
								UBE2Q2L	1.9e-08	0.38	Heart - Left Ventricle					15:85360001-85400000	15:85480001-85520000	8.81974e-08	Left_Ventricle	E083, E095, E105	ENSG00000207037:ENSG00000212388:ENSG00000271044	NA	NA
								WDR73	2.8e-08	0.19	Muscle - Skeletal					15:85360001-85400000	15:85320001-85360000	9.16433e-08	Left_Ventricle	E095, E105	ENSG00000136383	ALPK3	protein_coding
								LINC00933	3.9e-08	-0.3	Heart - Atrial Appendage					15:85320001-85360000	15:85360001-85400000	9.16433e-08	Left_Ventricle	E083, E095, E105, E104	ENSG00000136383:ENSG00000200991	NA	NA
								GOLGA2P7	4.7e-08	0.33	Heart - Atrial Appendage					15:85240001-85280000	15:85320001-85360000	4.25743e-07	Left_Ventricle	E095, E105	ENSG00000136383	ALPK3	protein_coding
								CSPG4P11	9.4e-08	0.36	Heart - Atrial Appendage					15:85320001-85360000	15:85240001-85280000	4.25743e-07	Left_Ventricle	E083, E095, E104, E105	ENSG00000140612	SEC11A	protein_coding
								CSPG4P12	3.1e-07	-0.26	Muscle - Skeletal
								ZNF592	6.6e-07	-0.1	Muscle - Skeletal
								ALPK3	2.8e-06	-0.11	Heart - Left Ventricle
								LINC00933	3.6e-06	-0.29	Heart - Left Ventricle
								ALPK3	6.4e-06	-0.12	Heart - Atrial Appendage
								CSPG4P12	6.6e-06	-0.28	Heart - Left Ventricle
								NMB	7.7e-06	0.17	Muscle - Skeletal
								LINC00933	1.1e-05	-0.18	Muscle - Skeletal
								RP11-182J1.18	3.6e-05	-0.2	Heart - Left Ventricle
								UBE2Q2L	3.9e-05	0.21	Muscle - Skeletal
								RP11-671M22.4	7.6e-05	-0.24	Heart - Left Ventricle
								RP11-182J1.18	7.6e-05	-0.19	Heart - Atrial Appendage
								RP11-182J1.14	8.1e-05	-0.19	Muscle - Skeletal
								WDR73	0.00011	0.22	Heart - Atrial Appendage
17	rs28768976	43688317	A/G	0.23	1.29 [1.20-1.39]	4.12e-12	SPPL2C	MAPK8IP1P2	3.6e-122	1	Muscle - Skeletal	KANSL1	1.5e-137	-1.4	Muscle - Skeletal	17:44120001-44160000	17:44240001-44280000	1.35577e-76	Left_Ventricle	E083, E104, E105, E095	ENSG00000214401	KANSL1-AS1	lncRNA
								KANSL1-AS1	3.4e-112	1	Muscle - Skeletal	MAPT	1.5e-110	-1.2	Muscle - Skeletal	17:44160001-44200000	17:44240001-44280000	8.48681e-74	Left_Ventricle	E083, E104, E105, E095	ENSG00000214401	KANSL1-AS1	lncRNA
								LINC02210	1.1e-103	0.69	Muscle - Skeletal	KANSL1	1.1e-71	-1.3	Heart - Left Ventricle	17:44120001-44160000	17:44200001-44240000	3.14467e-32	Left_Ventricle	NA	ENSG00000252698	NA	NA
								DND1P1	5.6e-102	1.1	Muscle - Skeletal	KANSL1	2.6e-70	-1.3	Heart - Atrial Appendage	17:43440001-43480000	17:43360001-43400000	3.57458e-29	Left_Ventricle	E095, E104, E105	ENSG00000006062	MAP3K14	protein_coding
								RP11-259G18.3	2e-95	1	Muscle - Skeletal	LRRC37A4P	5e-33	-0.78	Muscle - Skeletal	17:44800001-44840000	17:45040001-45080000	3.19188e-27	Left_Ventricle	E105, E104, E095, E083	ENSG00000264999:ENSG00000179673:ENSG00000263142	NA	NA
								RP11-707O23.1	2.1e-78	0.95	Muscle - Skeletal	LRRC37A4P	2e-14	-0.72	Heart - Atrial Appendage	17:44240001-44280000	17:44080001-44120000	1.05953e-25	Left_Ventricle	NA	ENSG00000262372	CR936218.1	lncRNA
								LINC02210	2.1e-68	0.9	Heart - Atrial Appendage	LRRC37A2	1.2e-12	0.44	Muscle - Skeletal	17:44080001-44120000	17:44240001-44280000	1.05953e-25	Left_Ventricle	E083, E104, E105, E095	ENSG00000214401	KANSL1-AS1	lncRNA
								LINC02210	1.9e-66	0.94	Heart - Left Ventricle	PLEKHM1	2.6e-11	-0.36	Muscle - Skeletal	17:44120001-44160000	17:44080001-44120000	1.11531e-21	Left_Ventricle	NA	ENSG00000262372	CR936218.1	lncRNA
								LRRC37A4P	9e-62	-1	Heart - Atrial Appendage	LINC02210	2.7e-11	-0.56	Heart - Atrial Appendage	17:44120001-44160000	17:44240001-44280000	5.44016e-18	Right_Ventricle	E083, E104, E105, E095	ENSG00000214401	KANSL1-AS1	lncRNA
								MAPK8IP1P2	7.5e-61	1	Heart - Left Ventricle	LINC02210	3.2e-10	-0.39	Muscle - Skeletal	17:44160001-44200000	17:44240001-44280000	6.94665e-18	Right_Ventricle	E083, E104, E105, E095	ENSG00000214401	KANSL1-AS1	lncRNA
								KANSL1-AS1	8.4e-61	1	Heart - Left Ventricle	MAPT	2.4e-06	0.4	Heart - Left Ventricle	17:43720001-43760000	17:43920001-43960000	9.97939e-18	Left_Ventricle	NA	ENSG00000185294	SPPL2C	protein_coding
								LRRC37A4P	2e-59	-0.8	Muscle - Skeletal	MAPT	4.1e-06	-0.45	Heart - Atrial Appendage	17:44240001-44280000	17:43360001-43400000	8.28942e-15	Left_Ventricle	E095, E104, E105	ENSG00000006062	MAP3K14	protein_coding
								LRRC37A4P	1.9e-57	-0.96	Heart - Left Ventricle					17:44240001-44280000	17:44080001-44120000	4.47322e-13	Right_Ventricle	NA	ENSG00000262372	CR936218.1	lncRNA
								LRRC37A2	1.3e-56	0.81	Muscle - Skeletal					17:44080001-44120000	17:44240001-44280000	4.47322e-13	Right_Ventricle	E083, E104, E105, E095	ENSG00000214401	KANSL1-AS1	lncRNA
								KANSL1-AS1	1.7e-56	1	Heart - Atrial Appendage					17:44240001-44280000	17:44200001-44240000	3.31249e-12	Left_Ventricle	NA	ENSG00000252698	NA	NA
								RP11-259G18.3	1.1e-55	1.1	Heart - Atrial Appendage					17:44200001-44240000	17:44240001-44280000	3.31249e-12	Left_Ventricle	E083, E104, E105, E095	ENSG00000214401	KANSL1-AS1	lncRNA
								RP11-259G18.3	8.5e-53	0.99	Heart - Left Ventricle					17:44160001-44200000	17:44080001-44120000	1.38018e-11	Left_Ventricle	NA	ENSG00000262372	CR936218.1	lncRNA
								MAPK8IP1P2	2.8e-51	0.98	Heart - Atrial Appendage					17:44240001-44280000	17:44040001-44080000	1.17568e-10	Left_Ventricle	E095, E105	ENSG00000256762	STH	protein_coding
								DND1P1	9.6e-43	1	Heart - Left Ventricle					17:44040001-44080000	17:44240001-44280000	1.17568e-10	Left_Ventricle	E083, E104, E105, E095	ENSG00000214401	KANSL1-AS1	lncRNA
								LRRC37A2	4.5e-41	0.83	Heart - Left Ventricle					17:43760001-43800000	17:43800001-43840000	6.55875e-09	Left_Ventricle	NA	ENSG00000265547:ENSG00000265964	NA	NA
								DND1P1	2.2e-40	0.99	Heart - Atrial Appendage					17:44800001-44840000	17:44240001-44280000	2.47812e-08	Left_Ventricle	E083, E104, E105, E095	ENSG00000214401	KANSL1-AS1	lncRNA
								LRRC37A2	7.2e-38	0.78	Heart - Atrial Appendage					17:44800001-44840000	17:44960001-45000000	4.65009e-08	Left_Ventricle	E083, E095, E104, E105	ENSG00000262031:ENSG00000261886:ENSG00000210709	NA	NA
								RP11-707O23.1	1.2e-29	0.87	Heart - Atrial Appendage					17:43760001-43800000	17:43920001-43960000	1.05113e-07	Left_Ventricle	NA	ENSG00000185294	SPPL2C	protein_coding
								RP11-707O23.1	2.5e-28	0.81	Heart - Left Ventricle					17:44160001-44200000	17:44200001-44240000	1.43173e-07	Left_Ventricle	NA	ENSG00000252698	NA	NA
								PLEKHM1	5e-28	0.26	Muscle - Skeletal					17:43440001-43480000	17:43320001-43360000	2.88614e-07	Left_Ventricle	E095, E104, E105	ENSG00000233483:ENSG00000267278:ENSG00000184361	NA	NA
								ARL17A	1e-19	0.47	Muscle - Skeletal					17:44120001-44160000	17:45240001-45280000	3.23239e-07	Left_Ventricle	E083, E104, E105, E095	ENSG00000004897:ENSG00000261872:ENSG00000198336	NA	NA
								RP11-798G7.8	2.3e-18	0.46	Muscle - Skeletal					17:43560001-43600000	17:40960001-41000000	4.50127e-07	Left_Ventricle	E095, E104, E105, E083	ENSG00000126581:ENSG00000131467:ENSG00000131480	NA	NA
								KANSL1	2.5e-16	0.32	Muscle - Skeletal					17:43920001-43960000	17:46440001-46480000	7.65375e-07	Left_Ventricle	NA	ENSG00000266222:ENSG00000200538	NA	NA
								MAPT	4.1e-13	-0.39	Heart - Left Ventricle					17:44800001-44840000	17:45040001-45080000	8.28219e-07	Right_Ventricle	E105, E104, E095, E083	ENSG00000264999:ENSG00000179673:ENSG00000263142	NA	NA
								LRRC37A	2.1e-11	0.39	Muscle - Skeletal					17:43440001-43480000	17:45560001-45600000	8.43664e-07	Left_Ventricle	E095, E083, E104, E105	ENSG00000228782	MRPL45P2	transcribed_unprocessed_pseudogene
								ARL17A	2.3e-11	0.53	Heart - Atrial Appendage
								ARL17A	5.1e-11	0.51	Heart - Left Ventricle
								MAPT-AS1	2.7e-10	-0.29	Muscle - Skeletal
								RP11-259G18.1	8e-10	0.49	Heart - Atrial Appendage
								RP11-259G18.1	4.3e-09	0.43	Heart - Left Ventricle
								LRRC37A	1.8e-07	0.39	Heart - Left Ventricle
								CRHR1	2e-07	0.23	Muscle - Skeletal
								NSF	1.6e-06	-0.18	Heart - Atrial Appendage
								LRRC37A	2.8e-05	0.31	Heart - Atrial Appendage
								RP11-259G18.1	3.1e-05	0.17	Muscle - Skeletal
								ARHGAP27	0.0001	-0.15	Heart - Left Ventricle
								ARL17B	0.00012	-0.23	Muscle - Skeletal
17	rs7210446	64307014	G/A	0.58	1.25 [1.16-1.34]	6.82e-10	PRKCA	PRKCA	3e-44	0.55	Heart - Left Ventricle					17:64200001-64240000	17:64600001-64640000	1.10236e-23	Left_Ventricle	E083	ENSG00000252685:ENSG00000251698	RNU6-928P:RNA5SP445	pseudogene:rRNA
								PRKCA	2e-13	0.38	Heart - Atrial Appendage					17:64200001-64240000	17:64640001-64680000	7.26194e-21	Left_Ventricle	NA	ENSG00000229330	AC006947.1	lncRNA
																17:64280001-64320000	17:64600001-64640000	2.55418e-20	Left_Ventricle	E083	ENSG00000252685:ENSG00000251698	RNU6-928P:RNA5SP445	pseudogene:rRNA
																17:64280001-64320000	17:64640001-64680000	1.97899e-12	Left_Ventricle	NA	ENSG00000229330	AC006947.1	lncRNA
																17:64280001-64320000	17:62520001-62560000	6.74349e-09	Left_Ventricle	NA	ENSG00000266566	NA	NA
																17:64280001-64320000	17:64360001-64400000	2.47812e-08	Left_Ventricle	NA	ENSG00000244044	RN7SL735P	misc_RNA
																17:64200001-64240000	17:63160001-63200000	8.23382e-08	Left_Ventricle	NA	ENSG00000265883	AC060771.1	processed_pseudogene
																17:64200001-64240000	17:62520001-62560000	8.27929e-08	Left_Ventricle	NA	ENSG00000266566	NA	NA
																17:64200001-64240000	17:65440001-65480000	1.87068e-07	Left_Ventricle	NA	ENSG00000244610:ENSG00000207688	NA	NA
18	rs4799426	34280891	A/G	0.35	1.38 [1.29-1.47]	4e-23	FHOD3					FHODD3	2.4e-10	-0.33	Muscle - Skeletal	18:34520001-34560000	18:34480001-34520000	2.21001e-18	Left_Ventricle	NA	ENSG00000267039	AC016493.1	lncRNA
												TPGS2	2.8e-08	-0.41	Heart - Atrial Appendage	18:34240001-34280000	18:33520001-33560000	6.84693e-11	Left_Ventricle	E095, E104, E083, E105	ENSG00000267627:ENSG00000141428	NA	NA
																18:34480001-34520000	18:35240001-35280000	2.89187e-07	Left_Ventricle	NA	ENSG00000243516	RPL12P40	processed_pseudogene
18	rs118060942	34280732	C/T	0.01	1.79 [1.45-2.20]	2.35e-08										18:34800001-34840000	18:34480001-34520000	8.77721e-07	Left_Ventricle	NA	ENSG00000267039	AC016493.1	lncRNA
																18:34480001-34520000	18:34800001-34840000	8.77721e-07	Left_Ventricle	E104, E105	ENSG00000267651:ENSG00000267707	NA	NA
22	rs2070458	24159307	T/A	0.22	1.34 [1.25-1.44]	7.12e-15	MMP11	MMP11	2.5e-24	-0.48	Heart - Left Ventricle					22:24120001-24160000	22:23520001-23560000	1.10737e-10	Left_Ventricle	E083, E095, E105, E104	ENSG00000186716:ENSG00000236794	NA	NA
								SMARCB1	7.3e-22	-0.37	Heart - Left Ventricle
								SMARCB1	3e-18	-0.25	Muscle - Skeletal
								VPREB3	3.7e-18	0.43	Muscle - Skeletal
								SMARCB1	7.5e-17	-0.34	Heart - Atrial Appendage
								MMP11	3.3e-16	-0.41	Heart - Atrial Appendage
								VPREB3	1.9e-08	0.44	Heart - Left Ventricle
								DERL3	1.2e-06	-0.2	Muscle - Skeletal
								AP000351.3	2.2e-05	-0.38	Heart - Atrial Appendage
								AP000351.4	4.8e-05	-0.34	Heart - Atrial Appendage
								AP000351.4	8.1e-05	-0.23	Muscle - Skeletal
FDR < 5% (p-value < 1.82 × 10-6)
2	rs7556984	11599732	A/G	0.66	1.20 [1.12-1.29]	5.21e-07	E2F6, ROCK2	E2F6	5.6e-15	-0.25	Heart - Left Ventricle
								E2F6	8.8e-14	-0.21	Heart - Atrial Appendage
								ROCK2	6.3e-10	0.15	Muscle - Skeletal
2	rs2003585	37123383	C/T	0.49	1.19 [1.12-1.27]	8.6e-08	STRN	STRN	4.5e-17	-0.17	Heart - Left Ventricle
								STRN	9.4e-11	-0.19	Heart - Atrial Appendage
								RP11-288C18.1	5.9e-09	-0.23	Heart - Left Ventricle
								RP11-288C18.1	1.6e-05	-0.18	Heart - Atrial Appendage
2	rs62177303	179768624	T/C	0.61	1.19 [1.11-1.28]	7e-07	TTN
3	rs4894803	171800256	A/G	0.4	1.20 [1.12-1.28]	3.51e-07	FNDC3B
5	rs66761011	29426502	A/G	0.17	1.42 [1.24-1.61]	1.45e-07	AK098570
5	rs10052399	138668504	C/T	0.26	1.23 [1.14-1.32]	6.21e-08	PROB1	DNAJC18	6.3e-32	0.48	Muscle - Skeletal
								DNAJC18	5e-14	0.36	Heart - Left Ventricle
								DNAJC18	4.8e-10	0.35	Heart - Atrial Appendage
								AC034243.1	2.1e-08	-0.41	Heart - Left Ventricle
								PROB1	3.8e-07	-0.14	Heart - Atrial Appendage
								AC034243.1	1.1e-05	-0.33	Heart - Atrial Appendage
								SPATA24	6.7e-05	0.13	Muscle - Skeletal
								PROB1	7e-05	-0.1	Heart - Left Ventricle
6	rs9320939	123818871	G/A	0.48	1.19 [1.12-1.27]	5.78e-08	TRDN	RP11-532N4.2	1.7e-05	-0.2	Heart - Atrial Appendage	TRDN	1.8e-22	-0.48	Muscle - Skeletal
8	rs7003871	125851510	T/C	0.34	1.18 [1.11-1.27]	1.14e-06	MTSS1	MTSS1	2.3e-25	-0.57	Heart - Left Ventricle
								LINC00964	2.3e-09	-0.28	Heart - Left Ventricle
								MTSS1	1.7e-06	-0.22	Heart - Atrial Appendage
9	rs734638	134489810	C/G	0.29	1.20 [1.12-1.29]	1.09e-07	RAPGEF1, POMT1
10	rs11196085	114505037	T/C	0.28	1.21 [1.13-1.30]	7.3e-08	TCF7L2
11	rs1390519	14928023	A/G	0.33	1.22 [1.13-1.33]	1.16e-06	CYP2R1
11	rs78310129	56793878	C/T	0.012	2.16 [1.64-2.84]	5.17e-08	OR5AK2
12	rs1480036	26344726	T/C	0.76	1.23 [1.14-1.34]	3.5e-07	SSPN	SSPN	2e-11	0.17	Muscle - Skeletal
								SSPN	2.1e-10	0.19	Heart - Left Ventricle
								SSPN	9.2e-09	0.21	Heart - Atrial Appendage
15	rs1814880	79021140	C/T	0.26	1.20 [1.12-1.28]	1.59e-07	CHRNB4	ADAMTS7P3	2.9e-18	-0.47	Heart - Atrial Appendage	ADAMTS7	6.2e-08	-0.37	Heart - Atrial Appendage
								ADAMTS7P3	1.1e-08	-0.4	Heart - Left Ventricle
								RP11-160C18.2	2.9e-19	0.32	Muscle - Skeletal
								CHRNA5	4.3e-06	-0.26	Muscle - Skeletal
								PSMA4	2e-05	0.083	Muscle - Skeletal
								CHRNA3	6.9e-05	-0.22	Muscle - Skeletal
19	rs117710064	779606	C/T	0.14	1.25 [1.14-1.36]	8.55e-07	AZU1
21	rs2832230	30536712	T/G	0.83	1.29 [1.16-1.42]	9.57e-07	MAP3K7CL	LINC00189	2.3e-12	0.58	Heart - Atrial Appendage
								LINC00189	2.6e-07	0.39	Heart - Left Ventricle

## Sheet: S5
Supplementary Table 5: Gene based analysis generated using MAGMA (v1.07) in FUMA (v1.3.5e). Results presented for genes deemed to be significant following Bonferroni correction (⍺ = 0.05/19026(total number of genes tested)). Data generated using summary statistics from multi-ancestry all-comer HCM meta-analysis (fixed-effects inverse-variance meta-analysis in GWAMA). MAGMA uses gene windows that …
CHR	START	STOP	NSNPS	NPARAM	N	ZSTAT	P-value	SYMBOL
10	121375882	121447331	224	35	48255	7.7858	3.4648e-15	BAG3
22	24094150	24186703	471	33	44270	7.4423	4.949e-14	SMARCB1
22	24163890	24238496	284	35	47637	7.3931	7.1696e-14	SLC2A11
22	24166690	24216315	194	24	47416	7.2122	2.7526e-13	DERL3
18	33842677	34370018	1334	137	47997	7.1224	5.3035e-13	FHOD3
1	16330523	16381089	301	30	47736	6.9927	1.3485e-12	HSPB7
1	16310370	16370545	339	31	48767	6.938	1.9888e-12	CLCNKA
1	16295731	16345302	231	23	49242	6.9266	2.1555e-12	C1orf64
1	16335272	16393803	357	36	46772	6.9042	2.5252e-12	CLCNKB
22	24114467	24161145	239	25	40700	6.8835	2.9197e-12	AP000349.1
22	24169375	24247410	297	44	47947	6.743	7.7581e-12	AP000350.10
22	24075413	24136503	184	32	43092	6.0745	6.2198e-10	MMP11
15	85324911	85426713	272	40	48527	6.011	9.2214e-10	ALPK3
17	43887256	43934438	287	7	49066	5.9998	9.8764e-10	SPPL2C
22	24084930	24131655	145	28	42151	5.989	1.0554e-09	VPREB3
17	44041616	44087060	239	6	48739	5.9489	1.3497e-09	STH
22	24073769	24128279	152	29	44179	5.9296	1.5187e-09	ZNF70
15	85109217	85181027	155	22	43756	5.9028	1.7872e-09	ZSCAN2
22	24070208	24118048	129	23	46658	5.8701	2.177e-09	C22orf15
1	16258364	16337627	234	25	49041	5.8513	2.4391e-09	ZBTB17
15	85175999	85232574	130	19	45325	5.819	2.9605e-09	WDR73
17	43664267	43923194	1115	10	45918	5.7508	4.4416e-09	CRHR1
17	43936748	44115700	959	6	47797	5.7485	4.5018e-09	MAPT
15	85188360	85236794	106	18	45822	5.6251	9.2683e-09	NMB
17	44097282	44337733	945	7	41792	5.5771	1.2229e-08	KANSL1
15	85256866	85359659	244	28	46634	5.5755	1.2344e-08	ZNF592
22	24098021	24145630	179	26	39657	5.5093	1.8015e-08	CHCHD10
6	36609305	36665116	200	22	49047	5.3109	5.4549e-08	CDKN1A
15	85202775	85294947	205	26	45389	5.2188	9.0034e-08	SEC11A
17	44633035	44844830	80	8	48033	5.2181	9.0383e-08	NSF
17	43461275	43546787	196	9	45383	5.1371	1.3952e-07	ARHGAP27
15	78906461	79055096	461	32	43684	5.0456	2.2601e-07	CHRNB4
9	134442157	134650461	621	42	44375	5.0284	2.4725e-07	RAPGEF1
5	138642276	138715406	72	12	48819	4.9496	3.7188e-07	PAIP2
5	36571457	36698436	325	62	49378	4.8892	5.063e-07	SLC1A3
17	43503266	43603115	163	7	40226	4.8507	6.1506e-07	PLEKHM1
6	123527483	123993238	1380	102	47032	4.7767	8.9119e-07	TRDN
10	121450609	121598652	337	26	47465	4.7744	9.0143e-07	INPP5F
5	138692885	138755242	59	8	49162	4.6945	1.336e-06	SLC23A1
1	16139359	16276955	296	27	47706	4.668	1.5208e-06	SPEN
6	118193689	118648839	1230	93	47016	4.6584	1.5932e-06	SLC35F1
2	179684484	179949813	861	71	46011	4.6557	1.6141e-06	CCDC141
10	121578972	121687068	359	18	49566	4.6406	1.7373e-06	MCMBP
11	14889553	14948798	67	14	50266	4.6242	1.88e-06	CYP2R1
19	46262975	46320810	127	19	49812	4.5827	2.2945e-06	DMPK

## Sheet: S6
Supplementary Table 6: Tissue enrichment analysis performed using gene-level association data using MAGMA (v1.07) in FUMA (v1.3.5e) with GTEx (v8.0) data. P values remain uncorrected for multiple comparisons.
GTEx v8 Tissue	BETA	BETA_STD	SE	P
Heart_Left_Ventricle	0.038933	0.064947	0.0089882	7.4563e-06
Muscle_Skeletal	0.02897	0.054799	0.0068341	1.1299e-05
Heart_Atrial_Appendage	0.039403	0.070706	0.0093177	1.1822e-05
Artery_Coronary	0.025612	0.050963	0.011487	0.01289
Artery_Tibial	0.020761	0.042736	0.0097299	0.016441
Adipose_Subcutaneous	0.019285	0.038471	0.010344	0.031145
Colon_Sigmoid	0.022061	0.043149	0.01199	0.032899
Artery_Aorta	0.017919	0.036559	0.0098809	0.034888
Nerve_Tibial	0.016585	0.033369	0.0097664	0.044754
Fallopian_Tube	0.019075	0.036992	0.011664	0.050994
Esophagus_Gastroesophageal_Junction	0.019163	0.037712	0.012379	0.060827
Esophagus_Muscularis	0.01773	0.034964	0.011972	0.069326
Adipose_Visceral_Omentum	0.015793	0.030658	0.01079	0.071654
Ovary	0.012389	0.025109	0.0093374	0.0923
Uterus	0.014031	0.028583	0.010646	0.093776
Lung	0.0092402	0.017859	0.008994	0.15213
Breast_Mammary_Tissue	0.011843	0.022765	0.012151	0.16488
Adrenal_Gland	0.0064395	0.012422	0.0096242	0.25172
Cells_Cultured_fibroblasts	0.0025351	0.0054317	0.0063915	0.34582
Cervix_Endocervix	0.0042695	0.0084502	0.011324	0.35307
Cervix_Ectocervix	0.0040464	0.0079285	0.011851	0.36639
Bladder	0.0042723	0.0083248	0.012542	0.36669
Liver	0.0021178	0.0038111	0.0062485	0.36733
Thyroid	0.0028863	0.0057155	0.0093813	0.37917
Testis	0.0011285	0.0019477	0.0054577	0.4181
Pituitary	0.00053033	0.0009881	0.0087892	0.47594
Skin_Sun_Exposed_Lower_leg	0.00043673	0.00084718	0.0075727	0.47701
Kidney_Medulla	-0.0012429	-0.0022965	0.0087687	0.55636
Pancreas	-0.0015632	-0.0026126	0.0082033	0.57556
Vagina	-0.0033185	-0.0063446	0.010824	0.62042
Stomach	-0.004083	-0.0074135	0.011574	0.63786
Skin_Not_Sun_Exposed_Suprapubic	-0.0028896	-0.0055703	0.0075619	0.64881
Minor_Salivary_Gland	-0.005806	-0.010802	0.0093858	0.7319
Kidney_Cortex	-0.0053345	-0.0093641	0.0085395	0.7339
Prostate	-0.007348	-0.013934	0.011627	0.73629
Whole_Blood	-0.0035127	-0.0063322	0.0055425	0.73688
Colon_Transverse	-0.0076137	-0.013992	0.011115	0.75332
Spleen	-0.0049167	-0.0097371	0.0071206	0.75505
Esophagus_Mucosa	-0.0060016	-0.011599	0.0075385	0.78702
Cells_EBV-transformed_lymphocytes	-0.0044037	-0.0096011	0.0047736	0.82186
Small_Intestine_Terminal_Ileum	-0.0091119	-0.016746	0.0092919	0.8366
Brain_Nucleus_accumbens_basal_ganglia	-0.0092733	-0.016083	0.0074049	0.89476
Brain_Hypothalamus	-0.010575	-0.01819	0.0079295	0.90882
Brain_Anterior_cingulate_cortex_BA24	-0.0095593	-0.01688	0.0070839	0.91139
Brain_Frontal_Cortex_BA9	-0.0099206	-0.018275	0.0067323	0.92969
Brain_Cerebellar_Hemisphere	-0.0090482	-0.018155	0.005912	0.93704
Brain_Amygdala	-0.012117	-0.020632	0.0077065	0.94205
Brain_Cortex	-0.010998	-0.02005	0.0069552	0.94308
Brain_Caudate_basal_ganglia	-0.012654	-0.021847	0.0076748	0.95039
Brain_Cerebellum	-0.010079	-0.020003	0.0060979	0.9508
Brain_Hippocampus	-0.015316	-0.025922	0.0078234	0.97486
Brain_Putamen_basal_ganglia	-0.016347	-0.027802	0.0077457	0.98258
Brain_Substantia_nigra	-0.018522	-0.031862	0.0083938	0.98632
Brain_Spinal_cord_cervical_c-1	-0.019367	-0.034782	0.0083768	0.9896

## Sheet: S7
Supplementary Table 7: Tissue enrichment derived from functional GWAS analysis. Codes relate to tissue types
Tissue	Code	Maximum likelihood estimate (95% CI)
Left ventricle	E095	3.142 (1.849-4.450)
Fetal heart	E083	3.051 (1.906-4.264)
Right ventricle	E105	2.614 (1.311-3.803)
Aorta	E065	2.326 (-0.362-3.732)
Right atrium	E104	2.165 (0.604-3.431)

## Sheet: S8
Supplementary Table 8: Sentinel loci with evidence of enrichment in cardiac specific cell types. Enrichment in cell types compared against a fine-mapping null GWAS model. Data highlighted in red correspond to tissue type demonstrating largest Bayes' Factor increase. P values remain uncorrected for multiple comparisons.
CHR	GRCh37 region start	GRCh37 region end	NULL Bayes' Factor	Bayes' Factor Jump	SNP	Z-score	P-value	Fetal heart	Left ventricle	Right atrium	Right ventricle
chr1	15841566	16857882	26.28	0.9626	rs1048302	8.47223	2.54e-17	0.9626	0.1807	-0.2057	0.829
chr2	11099948	12099664	4.27967	0.59937	rs7556984	5.02206	5.21e-07	0.59937	0.28665	-0.15139	-0.1066
chr3	13797445	14796791	7.25434	1.56155	rs13061705	5.74964	9.18e-09	1.56155	0.34245	0.06194	0.62118
chr3	171300505	172300207	2.9286	1.22373	rs4894803	5.09765	3.51e-07	1.16057	1.22373	1.1569	0.48276
chr8	125351871	126351430	2.71231	0.916	rs7003871	4.86985	1.14e-06	0.81967	0.74381	0.68082	0.916
chr9	133992978	134989683	6.42258	0.79143	rs734638	5.31443	1.09e-07	0.56289	0.79143	0.57003	0.69607
chr10	114005174	115004998	5.76535	1.02118	rs11196085	5.38766	7.3e-08	1.02118	0.18253	0.41906	0.33837
chr10	120916432	121915419	52.5807	1.2034	rs72840788	11.1878	5.06e-29	1.1572	1.2034	0.9921	0.6769
chr15	84651057	85739148	8.66729	0.7306	rs8033459	5.91525	3.41e-09	0.49024	0.7306	0.53791	0.63946
chr18	33745717	34780647	39.3196	0.5193	rs4799426	9.9106	4e-23	0.5193	0.1967	-0.2581	0.3314
chr19	279645	1278861	2.84803	0.78902	rs117710064	4.92604	8.55e-07	-0.71114	0.78902	-0.37596	0.68853
chr22	23660924	24681605	21.2401	1.1229	rs2070458	7.78828	7.12e-15	0.5729	1.1229	0.4589	1.0054

## Sheet: S9
Supplementary Table 9: Framework for the re-designation of variants of uncertain significance to facilitate the stratification of HCM into sarcomere positive and sarcomere negative groups. Abbreviations: OR: odds ratio; EF: etiological fraction; CI: confidence interval; VUS: variants of uncertain significance; MAF: minor allele
Gene	Effect	Literature based case vs. control analyses (PMID: 27532257)			Comment	VUS re-designation strategy
(Class of variant established as pathogenic)		All rare variants	Truncating variant	Non-truncating variants
ACTC1 (Missense)	Excess in HCM	0.0046	No evidence supporting enrichment in cases.	0.0046	Rare variants in this gene are enriched in HCM cases. Truncating variants are extremely rare, both in HCM cases and controls. Currently no evidence to support pathogenicity of this class of variant in HCM. No data to support enrichment of missense variants in any region/domain of the protein.	There is a high prior probability that a rare variant detected in this gene in an individual with HCM is pathogenic. Therefore, assuming there is no conflicting evidence, novel rare variants in this gene have been assigned the classification VUS-favouring pathogenic.
	OR [95% CI]	8 [5-14]		9 [5-15]
	EF [95% CI]	0.88 [0.78-0.93]		0.88 [0.79-0.93]
MYBPC3 (Predominantly truncating)	Excess in HCM	0.17	0.09	0.08	Rare truncating variants strongly associated with HCM. Most frequent pathogenic variant is a missense variant (p.R502W). Other recurrent pathogenic missense variants reported.	High prior probability that a rare truncating variant in this gene is pathogenic (most assigned Pathogenic). Novel missense variants (MAF <0.004% in gnomAD), and no other supporting evidence, assigned VUS-indeterminate. Missense variant with a frequency >0.01% in Northern European population assigned VUS-favouring benign. Novel missense variants (MAF >0.01% in gnomAD) but enriched in HCM cases of…
	OR [95% CI]	12 [11-13]	118 [86-169]	6 [5-6]
	EF [95% CI]	0.91 [0.91-0.92]	0.99 [0.99-0.99]	0.82 [0.80-0.84]
MYH7 (Missense)	Excess in HCM	0.128	No evidence supporting enrichment in HCM cases.	0.129	Rare missense variants in this gene are enriched in HCM cases; empirical data to indicate that variants cluster in HCM cases in codons 181-937*(which encode the functionally important motor domain, lever arm and part of the rod).	Novel rare variant in codons 181-937 are assigned VUS-favouring pathogenic. If other conflicting evidence such as lack of conservation, minor amino acid change-assigned VUS-indeterminate. Novel rare variant outside 181-937 assigned VUS-indeterminate. Novel rare variant outside 181-937, lack of conservation, minor amino acid change assigned VUS-favouring benign. Variant in codon 181-937, not previ…
	OR [95% CI]	12 [11-13]		12 [11-13]
	EF [95% CI]	0.91 [0.91-0.92] *EF(codons 181-937):0.97		0.92 [0.91-0.92] *EF(codons 181-937):0.97
TNNT2 (Missense)	Excess in HCM	0.0171	0.0015	0.0156	Rare variants in this gene are enriched in HCM cases. No data (as yet) to support enrichment of missense variants in any specific region/domain of the protein. Currently no strong evidence to support pathogenicity of truncating variants in HCM. However, pathogenic nonsense variants in C-terminal region of the gene have been reported; these are expected to escape NMD and therefore not considered t…	Novel missense variant in this gene (not detected in controls), conserved amino acid, biochemically different amino acids=assigned VUS-favouring pathogenic. Missense variant in this gene, MAF <0.01% in controls, but enriched in cases (OR >10), conserved amino acid, biochemically different amino acids=assigned VUS-indeterminate. Missense variant, MAF < 0.01% in controls, no evidence of enrichment …
	OR [95% CI]	8 [6-10]	6 [3-14]	8 [7-11]
	EF [95% CI]	0.88 [0.84-0.91]	0.83 [0.61-0.93]	0.88 [0.84-0.91]
TNNI3	Excess in HCM	0.02	No evidence supporting enrichment in HCM cases.	0.0195	Rare variants in this gene are enriched in HCM cases. Evidence of enrichment of missense variants in exons 7 and 8 of this gene (codons 125-210) in HCM cases compared to controls. Currently no strong evidence to support pathogenicity of truncating variants in HCM.	Novel missense variant in codon 125-210 (not detected in controls), conserved amino acid, biochemically different amino acids =assigned VUS-favouring pathogenic. Missense variant in codon 125-210, MAF <0.01% in controls, but enriched in case (OR >10), conserved amino acid, biochemically different amino acids=assigned VUS-indeterminate. Missense variant not in codon 125-210, MAF < 0.01% in control…
	OR [95% CI]	10 [8-13]		12 [9-15]
	EF [95% CI]	0.9 [0.87-0.92]		0.91 [0.89-0.93]
MYL3 (Missense)	Excess in HCM	0.007	No evidence supporting enrichment in HCM cases.	0.0071	Rare missense variants in this gene are enriched in HCM cases. No data to support enrichment of missense variants in any specific region/domain of the protein.	Caution with novel rare variants in this gene. No reliable criteria which can be used to assign ‘VUS-favouring pathogenic’ classification.
	OR [95% CI]	5 [3-7]		5 [3-7]
	EF [95% CI]	0.8 [0.7-0.86]		0.8 [0.7-0.86]
MYL2 (Missense)	Excess in HCM	0.0092	No evidence supporting enrichment in HCM cases.	0.0087	Rare missense variants in this gene are enriched in HCM cases. No data to support enrichment of missense variants in any specific region/domain of the protein.	Caution with novel rare variants in this gene. No reliable criteria which can be used to assign ‘VUS-favouring pathogenic’ classification.
	OR [95% CI]	6 [4-9]		7 [5-10]
	EF [95% CI]	0.84 [0.77-0.89]		0.85 [0.78-0.90]
TPM1 (Missense)	Excess in HCM	0.014	No evidence supporting enrichment in HCM cases.	0.014	Rare variants in this gene are enriched in HCM cases. Truncating variants are extremely rare, both in HCM cases and controls. Currently no evidence to support pathogenicity of this class of variant in HCM. No data to support enrichment of missense variant. No data to support enrichment of missense variants in any region/domain of the protein.	There is a high prior probability that a rare variant detected in this gene in an individual with HCM is pathogenic. Therefore, assuming there is no conflicting evidence, novel rare variants in this gene have been assigned the classification VUS-favouring pathogenic.
	OR [95% CI]	17 [12-25]		18 [12-26]
	EF [95% CI]	0.94 [0.92-0.96]		0.94 [0.92-0.96]

[truncated: 16 more sheets: S10, S11, S12, S13, S14, S15, S16, S17, S18, S19, S20, S21, S22, S23, S24, S25]
